1    Semi-automatic stitching of filamentous structures in  
2    image stacks from serial-section electron tomography

3

4    Norbert Lindow<sup>1</sup>, Florian N. Brünig<sup>1</sup>, Vincent J. Dercksen<sup>1</sup>, Gunar Fabig<sup>2</sup>, Robert  
5    Kiewisz<sup>2</sup>, Stefanie Redemann<sup>3</sup>, Thomas Müller-Reichert<sup>2</sup>, Steffen Prohaska<sup>1</sup>, Daniel  
6    Baum<sup>1\*</sup>

7

8    <sup>1</sup> Zuse Institute Berlin, Takustraße 7, 14195 Berlin, Germany

9    <sup>2</sup> Experimental Center, Faculty of Medicine Carl Gustav Carus, Technische  
10    Universität Dresden, 01307 Dresden, Germany

11    <sup>3</sup> School of Medicine, University of Virginia, Charlottesville, VA 22903, USA

12

13    \* Corresponding author

14    E-mail: [baum@zib.de](mailto:baum@zib.de)

## 15 **Abstract**

16 We present a software-assisted workflow for the alignment and matching of  
17 filamentous structures across a 3D stack of serial images. This is achieved by  
18 combining automatic methods, visual validation, and interactive correction. After an  
19 initial alignment, the user can continuously improve the result by interactively  
20 correcting landmarks or matches of filaments. Supported by a visual quality  
21 assessment of regions that have been already inspected, this allows a trade-off  
22 between quality and manual labor. The software tool was developed to investigate  
23 cell division by quantitative 3D analysis of microtubules (MTs) in both mitotic and  
24 meiotic spindles. For this, each spindle is cut into a series of semi-thick physical  
25 sections, of which electron tomograms are acquired. The serial tomograms are then  
26 stitched and non-rigidly aligned to allow tracing and connecting of MTs across  
27 tomogram boundaries. In practice, automatic stitching alone provides only an  
28 incomplete solution, because large physical distortions and a low signal-to-noise  
29 ratio often cause experimental difficulties. To derive 3D models of spindles despite  
30 the problems related to sample preparation and subsequent data collection, semi-  
31 automatic validation and correction is required to remove stitching mistakes.  
32 However, due to the large number of MTs in spindles (up to 30k) and their resulting  
33 dense spatial arrangement, a naive inspection of each MT is too time consuming.  
34 Furthermore, an interactive visualization of the full image stack is hampered by the  
35 size of the data (up to 100 GB). Here, we present a specialized, interactive, semi-  
36 automatic solution that considers all requirements for large-scale stitching of  
37 filamentous structures in serial-section image stacks. The key to our solution is a  
38 careful design of the visualization and interaction tools for each processing step to

39 guarantee real-time response, and an optimized workflow that efficiently guides the  
40 user through datasets.

41

## 42 **Author summary**

43 Electron tomography of biological samples is used for a 3D reconstruction of  
44 filamentous structures, such as microtubules (MTs) in mitotic and meiotic spindles.  
45 Large-scale electron tomography can be applied to increase the reconstructed  
46 volume for the visualization of full spindles. For this, each spindle is cut into a series  
47 of semi-thick physical sections, of which electron tomograms are acquired. The  
48 serial tomograms are then stitched and non-rigidly aligned to allow tracing and  
49 connecting of MTs across tomogram boundaries. Previously, we presented fully  
50 automatic approaches for this 3D reconstruction pipeline. However, large volumes  
51 often suffer from imperfections (i.e. physical distortions) caused during sectioning  
52 and imaging, making it difficult to apply fully automatic approaches for matching and  
53 stitching of numerous tomograms. Therefore, we developed an interactive, semi-  
54 automatic solution that considers all requirements for large-scale stitching of  
55 microtubules in serial-section image stacks. We achieved this by combining  
56 automatic methods, visual validation and interactive error correction, thus allowing  
57 the user to continuously improve the result by interactively correcting landmarks or  
58 matches of filaments. We present large-scale reconstructions of spindles in which  
59 the automatic workflow failed and where different steps of manual corrections were  
60 needed. Our approach is also applicable to other biological samples showing 3D  
61 distributions of MTs in a number of different cellular contexts.

## 62 Introduction

63 The segregation of chromosomes is an essential biological process and  
64 indispensable for each dividing cell. Failures in segregation can lead to defects for  
65 the emerging daughter cells as well as the entire organism. In general,  
66 missegregation is a major cause of aneuploidy and cancer. Therefore, a detailed  
67 understanding of the mechanisms of chromosome segregation is of significant  
68 biological importance.

69 In eukaryotic cells, chromosome segregation occurring during both mitosis and  
70 meiosis is achieved by bipolar microtubule (MT)-based spindles. The different  
71 stages of mitotic cell division are illustrated in Fig 1A. During prophase, the  
72 centrosomes start to move towards opposite sides of the cell, and a bipolar spindle  
73 mainly consisting of MTs and other associated proteins begins to form. At this point,  
74 the chromosomes begin to condense and become visible. The chromosomes then  
75 move towards the center of the cell at prometaphase. At metaphase, chromosomes  
76 are aligned at the metaphase plate and the chromatids are segregated subsequently  
77 (i.e. the sister chromatids in anaphase). Finally, the mitotic spindle is disassembled,  
78 and the nuclear membranes around the chromosomes are reformed in telophase.  
79 Quantitative analysis of MT arrangement is crucial for an understanding of spindle  
80 assembly and organization [1]. Three-dimensional reconstruction using electron  
81 tomography is an excellent tool to study the architecture of spindles with single-  
82 microtubule resolution [2]. When combined with appropriate techniques for  
83 specimen preparation, electron tomography allows an ultrastructural investigation of  
84 spindles at different stages of cell division and also a comparison of wild-type and  
85 mutant spindles, such as in the model system *Caenorhabditis elegans*.

86 In electron tomography of biological samples, imaging of serial sections is applied  
87 to reconstruct structures in 3D that are too large to image them directly. For this,  
88 samples are cryo-immobilized, embedded in plastic, and sectioned. The serial  
89 sections are imaged individually, generating one tomogram for each section. The  
90 tomograms then need to be stitched together to reconstruct the third dimension of  
91 the recorded cellular object (Fig 1B). To expand the imaged area in 2D (x/y), each  
92 serial section can consist of separate tiles that are acquired separately and then  
93 merged into a larger tomogram. Typically, such reconstructions from tiles and  
94 sections are done in 'reverse order', i.e. first, tiles are aligned to reconstruct a single  
95 section, called 'montaging', and second, the serial sections are combined to a  
96 complete stack. In this paper, we focus on the second step and assume that the  
97 first step was correctly processed. Depending on possible deformations caused by  
98 the physical sectioning and the interaction of the specimen with the electron beam  
99 during imaging, this stitching often requires a non-linear alignment. Corresponding  
100 structures in neighboring sections can be identified either based purely on image  
101 data or on segmented features.

102 Typically, the spindle geometry is reconstructed in two steps (Fig 1B (c,d)). In the  
103 first step, the MTs are segmented in each serial tomogram separately using  
104 template matching. This is followed by application of an automatic tracing algorithm  
105 in combination with data verification by users [3]. In the second step, the segmented  
106 MTs are used to automatically stitch the serial tomograms to a single stack [4]. Due  
107 to the local deformations during imaging, a non-linear alignment is required that  
108 often cannot be immediately determined due to the lack of obvious image features.  
109 Thus, tomograms have to be aligned by applying a variant of the coherent point drift  
110 algorithm (CPD) to the segmented MTs. For each interface between two serial

111 tomograms, the algorithm uses the MT ends of the two neighboring tomograms and  
112 the 3D directions at the MT ends and returns 2D landmarks as pairs of  
113 corresponding points. The MTs and tomograms are then warped using moving least  
114 squares based on the landmarks. Finally, a matching algorithm is applied on the  
115 transformed MTs to connect them over tomogram boundaries. With this approach,  
116 we previously achieved a 3D reconstruction of the first mitotic spindle in *C. elegans*  
117 embryos by electron tomography at a resolution of 5–8 nm [5], resulting in 30  
118 tomograms with reconstructions of up to 5 GB per tomogram (Fig 1C).

119 Previously, the stitching was designed and implemented as a fully automatic  
120 pipeline [4], which allowed only a final verification after the complete stack was built.  
121 Furthermore, a visual verification of the complete stack was difficult. Only small  
122 manual corrections were realistic for the full stack. As an example, when the  
123 alignment completely failed for one section interface, it was impossible to create a  
124 meaningful stack. Although the following semi-automatic solution had been  
125 developed in the context of MT reconstruction from stacks of electron tomograms,  
126 it is in principle, suitable for other problems, where stacks of 3D volumes containing  
127 filamentous structures need to be aligned. The filaments are explicitly represented  
128 and used throughout the entire process to achieve high reconstruction quality with  
129 consistent filament geometry across tomograms, which seems unrealistic with  
130 generic image-based registration approaches.

131 A fully automatic approach to stitch such tomograms is often problematic for two  
132 main reasons. First, the data quality may be poor due to the size of the tomograms  
133 and inaccuracies during specimen preparation or microscopy image acquisition. The  
134 sections may have suffered from physical damage. As a result, they may have been  
135 deformed or ruptured, causing the alignment to fail. Second, visual validation and

136 correction of the stitching result is difficult. An interactive inspection of each filament  
137 requires a prohibitive amount of time. With limited time, it is not obvious which subset  
138 to choose for inspection. There is also no mechanism to interactively correct the  
139 alignment and the filament matching if necessary, or to integrate user-provided  
140 information into the automatic matching process to improve it. If for some reason  
141 the automatic stitching failed between two tomograms, often the full stack could not  
142 be used anymore. Thus, in absence of options to manually improve aligned data  
143 sets of insufficient quality, the biological value of these data sets is limited.

144 In general, automatic methods accelerate the reconstruction of large volumes and  
145 usually operate successfully for images of expected quality. Automatic methods,  
146 however, can fail for specific cases due to unexpected data quality or underrepre-  
147 sented structures. In such situations, interactive tools are helpful to solve these  
148 specific cases and to allow the user to control the quality of the result. One of the  
149 most widely used semi-automatic software packages for electron tomography  
150 reconstruction is IMOD [6]. It is used in many laboratories for semi-automatic  
151 montaging and flattening of tomograms. A tool focusing on the alignment of serial  
152 tomograms of electron microscopy images was proposed by Anderson et al. [7]. The  
153 tool, named ir-tweak, provides an easy way to place landmarks with a direct real-  
154 time preview of the resulting non-linear warping using thin plate splines. We  
155 transferred this design to the alignment of serial tomograms containing filamentous  
156 structures. In contrast to thin plate splines, however, we use moving least squares  
157 for the warping. Berlanga et al. proposed a workflow for reconstructing 3D images  
158 from serial section confocal microscopy for the mouse brain [8]. Their workflow  
159 includes the flattening of the tomograms using manual landmark generation with  
160 IMOD as well as semi-automatic alignment of the section with ir-tweak. In 2012,

161 Cardona et al. reported on a tool for investigating neural circuits from serial section  
162 microscopy images [9]. The alignment is done completely automatically. The focus  
163 of their work is the semi-automatic interaction with the image data. To explore large  
164 connectome data sets, Beyer et al. proposed a framework that enables petascale  
165 volume visualization [10]. The complete montaging and sectioning are done in real-  
166 time based on an automatically pre-computed transformation. As for Cardona et al.,  
167 the tool is not designed to manually edit the transformation but to segment and  
168 explore neurites and synapses in the data. More recently, the same authors  
169 proposed an advanced tool to organize and inspect the whole segmentation process  
170 [11]. A tool for a related application, called Filament Editor, was proposed by  
171 Dercksen et al. [12]. It allows reconstructing 3D neuronal networks based on serial  
172 optical microscopy sections. The tool provides 3D visualization of the networks and  
173 image volumes as well as 2D slices and allows users to manually edit the networks.  
174 The serial tomogram alignment is computed automatically with a linear  
175 transformation. The networks that can be handled are sparse and small compared  
176 to the microtubules data sets that are the focus here.

177 Our goal was to stitch microtubules across a whole stack of serial-section electron  
178 tomograms in a semi-automatic way allowing for corrections during the stitching  
179 process. A number of requirements were identified for such an approach. The user  
180 should be able to influence all steps of the semi-automatic stitching process. In  
181 addition, the pipeline should be flexible such that the user can change the alignment  
182 or matching at any time. In the worst case, the user should be able to perform the  
183 whole stitching manually. In the best case, the user should be able to apply the  
184 stitching completely automatically. For cases of medium quality, minor manual  
185 interactions should support the automatic algorithms to rapidly increase the quality



186 of the reconstruction. The whole pipeline should be supported by visualizations to  
187 verify the current state and offer options to interactively correct errors. Finally, the  
188 application should be able to interactively handle all relevant data sizes, which could  
189 be up to 30 tomograms with 5 GB each.

190 In this paper, we present a software-assisted workflow to address these  
191 requirements. Two related problems need to be solved: (1) the alignment problem,  
192 where the serial tomograms are transformed such that they fit together; and (2) the  
193 matching problem, where the filament structures are combinatorially connected  
194 between neighboring tomograms. In summary, we make the following key  
195 contributions:

- 196 • Design of a user-controlled workflow (Fig 2) to solve the stitching problem  
197 that integrates automatic alignment and matching. The automatic algorithms  
198 take user input into account to quickly generate and continuously improve the  
199 result.
- 200 • Implementation of a new visualization method to monitor tomogram regions  
201 that have already been visually inspected by the user.
- 202 • Development of the 'Serial Section Aligner', a new software tool with multi-  
203 view visualizations and interactions designed to support this workflow. A user  
204 can inspect both the images and the segmented filaments in order to validate  
205 and correct the alignment and matching.

206 The workflow is demonstrated for serial-section electron tomography of both mitotic  
207 and meiotic spindles of high-pressure frozen and plastic-embedded material.

## 208 **Results**

209 Based on the requirements stated in the previous section, we concluded that both  
210 alignment and matching should be first solved locally for each section interface, i.e.  
211 the cut between two neighboring tomograms. Subsequently, the full stack should be  
212 constructed from the local solutions. These conclusions lead to the following design  
213 decisions for stitching of a single section interface:

- 214 • The two tomograms of the interface should be interactively visualized with  
215 the current local alignment and matching such that errors can be quickly  
216 detected.
- 217 • Simple interaction tools should allow one to set or change the alignment with  
218 manual landmarks. Additionally, completely discarding the automatic  
219 alignment should be possible.
- 220 • Manual landmarks can be used to improve the initialization of the automatic  
221 alignment computation.
- 222 • The current matching can be changed by adding or removing matches  
223 manually. Manual matches should influence the re-computation of the  
224 automatic matching. Furthermore, the user should be able to confirm  
225 automatic matches or unmatched MT ends, which will from then on remain  
226 in the confirmed state.
- 227 • In contrast to the previous fully automatic pipeline [4], only matched filament  
228 endpoints should impact the automatic alignment in order to control the  
229 consistent microtubule geometry reconstruction across tomograms.
- 230 • The application should give immediate visual feedback about the incremental  
231 matching progress.

232 The stitching tool was implemented as two modules in the visualization software  
233 Amira [13]. The first module is a data class (*Serial Section Stack*) that manages the  
234 input data and the stitching state. The second module (*Serial Section Aligner*)  
235 implements the visualizations and editing operations of the stitching workflow.

## 236 **Serial section stack**

237 A ‘Serial Section Stack’ contains the data regarding all serial tomograms of the stack  
238 including the reconstructed filaments. Assume the serial section stack contains  $n$   
239 tomograms, they will be denoted by  $T_1, \dots, T_n$ . For the stitching of the stack (Fig 1B),  
240 we expect that each tomogram has been pre-processed, i.e distortions along the  
241 thin tomogram side, which are usually the z-direction, have been removed in a  
242 flattening pre-processing step, followed by a cropping step. Furthermore, the  
243 filaments have been segmented and verified for each tomogram. We will denote the  
244 set of filaments of tomogram  $T_i$  by  $F_i$ , where each filament  $f \in F_i$  is a piecewise  
245 linear curve with  $f = \{p_1, \dots, p_k\}$  and  $p_j \in \mathbb{R}^3$ . We further assume that the stack is  
246 always built in z-direction. We call a slice of the tomogram that lies in the x-y-plane  
247 a z-slice w.r.t. a certain z-value.

248 In addition to the tomograms and their corresponding filament sets, the ‘Serial  
249 Section Stack’ also stores the stitching state for each of the  $n - 1$  interfaces between  
250 neighboring tomograms. A stitching state contains sets of landmarks on the  
251 tomogram boundaries and sets of matchings representing corresponding filament  
252 ends.

## 253 **Serial section aligner**

254 The 'Serial Section Aligner' module provides two modes. The alignment mode  
255 allows the user to manually add, modify, and remove landmarks. The matching  
256 mode, on the other hand, enables the automatic computation of a matching in  
257 combination with manual editing and verification. In order to visualize the current  
258 state of the matching and alignment and to allow for manual interaction, the module  
259 uses a four-view visualization (Fig 3). In addition, the module has a graphical user  
260 interface (GUI) to adjust the module parameters (Fig 2A). The first part of the GUI  
261 is independent of the specific mode. It allows selecting the currently investigated  
262 section interface, adjusting visualization parameters for the interface, changing the  
263 position of the two z-slices of the neighboring tomograms, respectively, and  
264 adjusting the scale of the filament radii. The user can also choose to control quality  
265 parameters, which have a major effect on the performance. The second part of the  
266 GUI depends on the active mode, as described below. The third part allows the user  
267 to adjust and create the full stack as the final step of the stitching process. The  
268 software is available as extension package for Amira. The application is shown in  
269 the Video S1.

270 **Alignment mode.** This mode is for adjusting the alignment of a pair of tomograms  
271 for a selected interface. The four views in the visualization window (Fig 3) are used  
272 in the following way. The **top left view** displays a z-slice of the upper tomogram of  
273 the selected interface. Accordingly, the **bottom left view** displays a z-slice of the  
274 lower tomogram. The user can move and zoom simultaneously in both slices to  
275 navigate. Additionally, the user can change the positions of both z-slices with two  
276 sliders (Fig 2A). The two sliders are synchronized per default; when the top z-slice  
277 is decreased by the user, the bottom one is automatically increased and the other

278 way around. The views allow the user to identify corresponding features in the  
279 tomograms, such as vesicles, chromosomes, or membranes. To explicitly match  
280 features in the two z-slices, the user can add, move, or delete manual landmarks  
281 with mouse interactions in the two left views. Landmarks always occur as a pair of  
282 2D points, one point for each tomogram. The points are placed such that they mark  
283 corresponding biological structures. In our visualizations, they are rendered as red  
284 circles on the z-slices. Radii of the circles can be adjusted by the user. During  
285 landmark placement, a rigid transformation is computed based on the current  
286 landmarks. The transformation globally rotates and translates the top slice, thereby  
287 ignoring distortions, such that corresponding regions are displayed for the top and  
288 bottom tomogram during navigation (panning and zooming).

289 In the **top right view**, an overlay of the selected z-slices is visualized by using  
290 transparency in combination with two different colors: blue for the top slice and  
291 yellow for the bottom slice. Based on the interactions in the left views, the z-slice of  
292 the upper tomogram is warped in real time such that landmarks of corresponding  
293 locations are mapped onto each other. This allows the user to interactively evaluate  
294 the current alignment and to iteratively improve it by adding more landmarks or by  
295 modifying existing landmarks.

296 In addition to visualizing the tomogram data and the landmarks, the filaments that  
297 intersect the z-slices are also visualized in all three views. Filaments of the bottom  
298 tomogram are displayed in yellow and the filaments of the top tomogram in blue,  
299 corresponding to the colors of the tomogram overlay visualization in the top right  
300 view.

301 Finally, the **bottom right view** shows an abstract illustration of the whole stack and  
302 the selected interface with the pair of tomograms. The user can change the interface  
303 with a mouse click onto the illustration. Again, the same colors are used, yellow for  
304 the bottom and blue for the top tomogram. Next to the stack, a vertical histogram is  
305 shown. Each bin of the histogram shows the density of the unmatched filament ends  
306 for 25% of a tomogram extent in z-direction. At the beginning, the histogram usually  
307 shows higher densities at the interface boundaries, because the filaments are not  
308 yet matched. During the stitching process these differences decrease as more and  
309 more filament ends are matched. The plot helps the user to evaluate the overall  
310 quality but also to identify the most critical interfaces that need further investigation.  
311 A high density of unmatched ends at a tomogram boundary compared to the ends  
312 within the tomogram indicates an incomplete matching.

313 In addition to manual landmarks, automatic landmarks (yellow) can be generated  
314 from matched filaments. This approach is described in the following section. The  
315 user can also remove and manipulate these landmarks. However, if the automatic  
316 landmark placement is activated, these landmarks will be updated by changes in  
317 the matching.

318 **Matching mode.** In this mode, the user defines the matching between the filaments  
319 of the two tomograms. This is supported by four views and the possibility to  
320 automatically compute the matching in combination with manual editing (Fig 4).

321 In the **top right view**, again an **overlay** of the z-slices is visualized together with the  
322 filaments. The filaments are colored according to the matches. Automatic matches  
323 are depicted in different shades of red and manual ones in shades of green. The  
324 colors are taken from ColorBrewer.org [14]. Unmatched filaments are visualized in

325 black. Because a filament can be matched at both ends, the color fades out from  
326 one end to the middle of the filament to avoid ambiguous coloring. In addition to the  
327 coloring, a match between two filaments is visualized by a line, which also fades out  
328 accordingly. To keep track of which filament corresponds to which tomogram, a  
329 colored border around each filament is drawn. Again, blue is used for the filaments  
330 of the top tomogram and yellow for the ones of the bottom tomogram. The user can  
331 select two filament ends of the two tomograms with the mouse to either add a  
332 manual matching or to remove it.

333 To facilitate the matching decisions, the overlay view is supported by a **side view**  
334 on the **bottom left** and a **3D view** on the **top left**. During navigation, the three views  
335 are simultaneously updated. To keep track of the side view, two lines are displayed  
336 in the overlay view that illustrate the position and orientation of the side view. The  
337 user can select an arbitrary filament of the bottom tomogram in the overlay view,  
338 and the side view is immediately aligned such that this filament is centered and  
339 contains the tangent of the filament. The side view enables the user to evaluate the  
340 slope of matched or unmatched filaments. It also helps detecting distortions that  
341 prohibit an automatic matching and help define manual matches for such cases.  
342 Similar to the lines in the overlay view that depict the positions of the side view, two  
343 lines in blue and yellow depict the position of the z-slices. The 3D view shows all  
344 MTs of a local region around the center of the overlay view. In this view, the user  
345 can zoom, pan, and rotate the scene. To avoid visual clutter, the region is cut by a  
346 sphere with a user selected radius. Similar to the side view, the 3D view shows a  
347 part of the tomogram within the cutting sphere as a transparent slice. The 3D view  
348 is particularly helpful to investigate the shape of multiple filaments at once.

349 At any time, the user can trigger an automatic (re-)computation of the matching  
350 based on the current alignment. At present, the matching is computed using the  
351 algorithm described by Weber et al. [4]. However, this part works as a black box for  
352 any suitable filament matching algorithm. The algorithm takes as input the  
353 transformed 3D positions of the filament ends with approximated 3D directions of  
354 the two neighboring tomograms. Furthermore, the algorithm receives information  
355 about all matched filament ends that should not be touched anymore. If the user  
356 checks 'automatic landmarks' in the GUI (Fig 2A), the ends of matched filaments  
357 will be used to generate automatic landmarks for the alignment of the tomograms.  
358 A validation stepper is embedded in the GUI and is accessible via keyboard  
359 shortcuts. It allows the user to step through all filament ends in the matching region  
360 of the bottom tomogram. The stepper automatically centers the views to the  
361 currently selected filament end. The user can confirm the current state of a filament  
362 end, whether it is matched or not. The stepper will not display confirmed ends again.  
363 All filament ends with manual matches are confirmed by default. When all filament  
364 ends of the bottom tomogram have been confirmed, the states of the ends of the  
365 top tomogram are implicitly also confirmed. For this reason, it is sufficient to observe  
366 the filament ends on only one side of the interface. Due to time restrictions, users  
367 are often not willing to confirm all filament ends, but only a fixed number such as  
368 100–200. To prevent that these filament ends are not distributed equally over the  
369 whole tomogram, the order of the ends is shuffled at random. In addition to stepping  
370 through the filament ends, the user can also directly select a filament end of the  
371 bottom tomogram in the overlay view and confirm its state. To keep track of the state  
372 of open and confirmed ends, the GUI always displays their numbers.



373 The last view, the **bottom right view**, is used to display the current state of the  
374 matching process. It shows the z-slice of the bottom tomogram, subdivided into  
375 Voronoi regions of the filament ends in the matching region. Regions that  
376 correspond to filament ends for which the user has confirmed the state are displayed  
377 in a bright color. Automatically matched ends that were not explicitly confirmed by  
378 the user are displayed less bright. The remaining regions, containing all unmatched,  
379 unconfirmed filament ends, are displayed in a dark color. The map always displays  
380 the same view for the bottom tomogram as in the overlay view. By selecting a region  
381 in this map, the stepper jumps automatically to the corresponding microtubule end.  
382 Hence, the map can help to evaluate the automatic matching and to steer the  
383 manual investigations. Especially for large data, regions in the tomogram that need  
384 further attention can thus be identified quickly.

385 Within the fourth view, again the end point density for the current interface is shown.  
386 The histogram consists only of four bins, two for the upper 50% of the bottom  
387 tomogram and two for the lower 50% of the top tomogram. The leftmost histogram  
388 shows the current state, while the others show the temporal evolution. A new  
389 histogram is added after each recomputation of the automatic matching. With this,  
390 the user can quickly evaluate the impact of the previous manual editing.

391 **Construction of stacks.** When the filament ends of all section interfaces have been  
392 matched adequately, the matchings can be used to warp all tomograms of the whole  
393 stack and create a merged volume. For this, one tomogram is selected as base  
394 tomogram. Hence, this tomogram will not be warped. The tomograms above and  
395 below the base tomogram are warped based on the landmarks of the corresponding  
396 interfaces. The warped tomograms are then resampled into a single volume  
397 containing all tomograms of the whole stack. The warping is done similarly for the

398 filaments. Matched filaments are joined over the section interfaces. Each point of a  
399 filament receives an integer attribute that stores the original tomogram ID of the  
400 point. If the quality of the tomograms and the distribution of the filaments is more or  
401 less uniform over the full stack, the middle tomogram should be ideal as a base  
402 section to avoid accumulating the warping error over more interfaces than  
403 necessary. Otherwise, one should select a tomogram close to the middle of the  
404 stack with the best quality and filament distribution.

405 The GUI has a dedicated parameter section for the creation of the full stack. A  
406 checkbox allows the user to create only the stack of the filaments without the aligned  
407 tomograms, which is much faster. Choosing a lower resolution for the x- and y-  
408 directions of the tomograms is another way to increase speed and reduce memory  
409 consumption. Both options help to quickly generate a preview of the stack or create  
410 results on systems that do not have enough RAM to merge the tomograms at full  
411 resolution.

## 412 **Recommended workflow**

413 For applying the 'Serial Section Aligner', we recommend the following overall  
414 workflow (Fig 2B). After creating the 'Serial Section Stack' object and detecting the  
415 correct tomogram order, the section interfaces will be processed one after another.  
416 For each interface, the sections should be sufficiently aligned and the filaments  
417 matched such that it should not be necessary to revisit the interface. This is  
418 recommended, because frequent switches between section interfaces can be time  
419 consuming due to repeated loading of tomograms. When the quality of the  
420 tomograms is good and the filaments are distributed well over the whole tomograms,  
421 the user should directly switch to matching mode and check the automatic

422 computation of the matching. If both matching and alignment look good, the user  
423 should step over a fixed number of filament ends and confirm or possibly correct  
424 them. Finally, if in some regions there are very few or no filaments, the user should  
425 consider adding a few manual landmarks in those regions.

426 If the automatic matching failed completely, the user should clear the matching.  
427 Now, there are two possibilities to continue, which can also be combined. First, the  
428 user sets a few manual landmarks in alignment mode and reruns the automatic  
429 matching. Second, the user manually matches a few filaments, which also results in  
430 new landmarks, and reruns the automatic matching. Usually, the second option is  
431 only reasonable if the sections are almost aligned. As soon as the automatic  
432 matching seems to produce reasonable results, an iterative process starts with  
433 correcting or adding manual matches in combination with an automatic re-  
434 computation. Usually, small manual corrections help to improve the whole region in  
435 the neighborhood with the automatic matching. It is recommended to look for the  
436 same unique patterns of filament ends in both sections by moving the z-slices. An  
437 example is shown in Fig 5A,C, where the automatic matching failed locally, and the  
438 placement of two manual matches helped to improve the automatic matching for the  
439 complete region (Fig 5B,D). Finally, the same procedure is followed as described  
440 above for a direct successful automatic matching.

441 When the direction of the filaments is highly distorted, it might be useful to either  
442 completely deactivate the automatic landmark placement by the checkbox in the  
443 GUI or forbid the landmark computation for a certain filament match. The latter can  
444 be done with a keyboard shortcut for the selected matched filament end. Already  
445 placed automatic landmarks can be removed in the alignment mode. In case the

446 automatic landmark placing is disabled, mainly modifications of manual landmarks  
447 can improve the automatic matching.

## 448 **Technical aspects**

449 **Stack data structure.** As described above (see section *Serial Section Stack*), the  
450 serial section data is handled in a stack data structure. If  $n$  is the number of sections,  
451 then the stack stores  $n$  tomograms  $T_i$  with their corresponding filament data sets  $F_i$ .  
452 The data sets are stored in the file system. The stack data structure loads  
453 tomograms and filaments on demand and hands them over to the ‘Serial Section  
454 Aligner’ module. During alignment and matching, only two tomograms are loaded  
455 into RAM at the same time.

456 For each of the  $n - 1$  section interfaces between consecutive tomograms, a set of  
457 landmarks and a matching is stored. As briefly described above, landmarks always  
458 occur as pairs of 2D points in x-y-space, one point for each of the neighboring  
459 tomograms. The points mark corresponding locations on the two sides of an  
460 interface and define an x-y-transformation that warps one tomogram into the space  
461 of the neighboring one such that the tomograms and filaments are aligned. Because  
462 the tomograms are thin with a flat boundary in z-direction, after the pre-processing  
463 step, warping is only defined as an x-y-transformation, ignoring z. In addition to the  
464 pair of points, each landmark has a type attribute that stores the source of the  
465 landmark. The source can be manual or automatic. As described earlier, these types  
466 will be colored in red and light yellow, respectively.

467 A matching is stored as a set of quadruples. A match between  $F_i$  and  $F_{i+1}$  is stored  
468 as  $(a,1,b,0)$ , where the end of filament  $a \in F_i$  is matched with the start of filament  $b \in$

469  $F_{i+1}$ . Similar to the landmarks, each match has a type attribute that is either manual  
470 or automatic.

471 Filament end states are stored for the bottom tomogram of each interface to  
472 maintain the matching state. A filament end state can be either confirmed or  
473 undefined.

474 **Slice rendering.** The rendering of tomogram slices is essential for the visual  
475 assessment of the filament alignment and matching. Our tool supports fully  
476 interactive visualization of top- and side-view slices for both original and warped  
477 tomograms.

478 Let us first consider the case without warping. The cost for rendering a slice that is  
479 computed in tomogram space scales with the tomogram size. If the dimensions of  
480 the tomograms are large, it can be difficult to achieve interactive frame rates. The  
481 screen, however, has a limited number of pixels. In most cases, either only a part of  
482 the slice is displayed, or it is far away from the camera so that the size of a voxel is  
483 much smaller than a pixel. Hence, small details will not be visible, and it would be  
484 inefficient to render a slice at full resolution in tomogram space. Instead, we render  
485 slices in view space. For this, in the first step, we compute for each pixel of the view  
486 the 3D position within the slice. This is done by computing the view ray through the  
487 pixel and detecting the intersection of the ray with the slice plane. Additionally, it is  
488 checked if the intersection point is located outside the bounding box of the  
489 tomogram. In the next step, we evaluate for each point inside the tomogram the  
490 intensity value using trilinear interpolation. Both steps are performed on the CPU  
491 using OpenMP, because tomograms may not fit into GPU RAM. Finally, a screen  
492 space-filling quad is rendered that is textured with the computed intensity values.

493 With this approach, the number of memory accesses into the tomogram is limited  
494 by the number of pixels of the screen. Although we observed that rendering is  
495 interactive even for large tomograms and many cache misses, the user can explicitly  
496 switch between different slice qualities. For high quality, the full view resolution is  
497 considered, for medium quality, half the resolution, and for low quality, only one  
498 fourth of the view resolution. This can further increase the interactivity, especially on  
499 large screens.

500 Next, let us consider the warped case for the overlay views of the tomograms. Again,  
501 the 3D position of the slice for each pixel is computed in the space of the bottom  
502 tomogram, but without the check whether a point is located inside or outside the  
503 tomogram. To get the correct intensity values of the top tomogram in the space of  
504 the bottom tomogram, the positions need to be transformed into the space of the  
505 top tomogram. This is done using the moving least squares approach by Schaefer  
506 et al. [15]. For a large number of landmarks, real-time rendering of the slices might  
507 not be possible, especially for changing landmarks. However, typically the number  
508 of landmarks is much lower than the number of voxels within the slice. Furthermore,  
509 local warping results cannot be observed if the slice is far away from the user. For  
510 this reason, we apply a 2D grid in screen space. Then, for each grid point, the  
511 corresponding 3D point on the slice is detected and only the grid points are warped.  
512 For all points within a grid cell, bilinear interpolation of the warped cell is applied to  
513 compute the warped position (Fig 6). This accelerates the rendering of the warped  
514 slice, so that it can be interactively updated during landmark or slice changes.  
515 Additionally, it creates a kind of level of detail: the correctness of the warping  
516 increases the closer the user zooms into the slice. Since the warping affects only  
517 the x-y-space of the tomogram, it is sufficient to use a 1D grid for side views.

518 We can further increase the rendering performance for the warped slices using an  
519 approximation of the moving least-squares approach. In its original implementation,  
520 all landmarks are used to transform a point. However, since the influence of a  
521 landmark decreases with increasing distance, it is sufficient to detect the closest  $k$   
522 landmarks to transform a point. To do this in an efficient way, all landmarks are  
523 stored in a grid data structure.

524 **Landmark rendering.** Each landmark is visualized in the alignment mode as a  
525 circle on the z-slice (Fig 3A,B). The circles have a constant size in screen space  
526 with a scaling parameter. This seems to be superior to object-space radii, because  
527 the visible circle size remains constant across zoom levels, which simplifies user  
528 interaction. For each circle, a single vertex is generated that is then extended to a  
529 quad in the geometry shader on the GPU. The center of the quad is the center of  
530 the landmark, and the sides equal the diameter of the circle. Then, in the fragment  
531 shader, the corresponding position on the quad is inserted into the implicit circle  
532 equation to check whether the fragment is inside or outside the circle. All fragments  
533 inside the circle are colored according to the landmark type. In addition, the  
534 transparency of the color is increased for fragments close to the center of the circle.  
535 This allows the user to see the image feature that is related to the landmark.

536 **Filament rendering.** As mentioned in Section 'Serial Section Stack', each filament  
537 is represented as a piecewise linear curve, given by a set of points  $p_1, \dots, p_n$ . Each  
538 filament in our reconstructions is represented by a sphere at each point  $p_i$  and a  
539 cylinder between two points  $p_i$  and  $p_{i+1}$  with constant radius of both the spheres  
540 and the cylinders. To display the filaments within the selected slices in the  
541 tomogram, only the intersection of the spheres and cylinders with the slice is  
542 visualized. To avoid an expensive triangulation of the spheres and cylinders with

543 additional intersection computations, the rendering is based on the ray casting of  
544 quadrics proposed by Sigg et al. [16]. Each sphere is represented initially as a single  
545 3D vertex. A geometry shader is used to create a quad from this vertex that encloses  
546 the sphere after projection. Ray casting is performed in the fragment shader.  
547 Similarly, for each cylinder, two 3D vertices are created for the start and end points,  
548 respectively. Then in the geometry shader, a quad is created that encloses the  
549 cylinder after projection. Finally, ray casting is used in the fragment shader to find  
550 the intersection of the view ray with the cylinder.

551 To quickly update the filament visualization of the warped tomogram in the overlay  
552 view, all spheres and cylinders that intersect the slice are detected in a first step.  
553 Then, only these spheres and cylinders are warped and visualized in a second step.

554 Both, filaments and landmarks, are rendered first in a frame buffer. During the  
555 rendering on the slice, a shader is used to apply anti-aliasing to the boundaries. To  
556 do so, for each fragment at the boundary, the tangent line is computed based on an  
557 analysis of the neighboring fragments in the four main directions. The line is used  
558 to compute a blending value for the fragment. Furthermore, for close-up views on  
559 the filaments or landmarks, the line is used to create a pixel-wide anti-aliased black  
560 silhouette. This procedure drastically increases the visual quality and helps to  
561 distinguish between slice data and filaments or landmarks.

562 **Filament end state map.** In matching mode, a map depicts which filament ends are  
563 already confirmed, which ends are automatically matched but not confirmed, and  
564 which ends are unmatched and not confirmed (Fig 7). This map is generated and  
565 updated in the following way.



566 First, a discrete 2D scalar field is created that has the same boundary in the x- and  
567 y-directions as the bottom tomogram. Then for each sample position of the scalar  
568 field, the closest distance to all filament ends in the matching region of the bottom  
569 section is computed. The identifier of the closest filament end is stored at this  
570 position in the scalar field. Hence, the scalar field is a discrete representation of the  
571 Voronoi diagram of the filament ends in the matching region. Note that this map  
572 needs to be updated only when the user changes the matching region.

573 Then the z-slice of the bottom section is rendered as described above. However,  
574 during the detection of the intensity value in the tomogram for a pixel, additionally  
575 the closest filament end is determined from the pre-computed Voronoi diagram.  
576 Then the state of the end is used to modulate the brightness of the intensity value,  
577 as described previously in the 'Matching Mode' section. An illustration of the filament  
578 end state map is displayed in Fig 7.

## 579 **Matching and alignment examples**

580 Using the described tools, more than 20 data sets were assembled so far. The data  
581 sets were obtained from different specimens, different types of spindles (i.e. mitotic  
582 *versus* meiotic ones), and different stages of cell division, as well as from both wild-  
583 type and mutant samples. In Fig 8, four of these spindles are shown as  
584 reconstructed tomogram stacks with stitched MTs. These examples demonstrate  
585 the structural diversity of microtubule-based spindles.

586 In the following paragraphs, three challenging datasets are described in detail. For  
587 the first two, experimental problems had to be tackled, such as damaged sections  
588 or poor image quality. The third example represents the largest spindle that has  
589 been reconstructed so far. We used it as benchmark for our system.

590 **Mitotic spindle at prometaphase.** In this phase of mitotic cell division in *C.*  
591 *elegans*, numerous MTs emanate from the centrosomes and enter the pronuclei  
592 through the fragmented nuclear membranes to make contact to the chromosomes.  
593 The sample stack contains a region around the pronuclei and consists of 7 sections  
594 with 300–500 MTs per section (Table 1; T0345-11; [5]). Due to the field of view with  
595 the nucleus in the center, most of the MTs are close to the image boundaries in x-  
596 y. Hence, the original, fully automatic workflow failed (Fig 5A,C). None of the section  
597 interfaces could be aligned. The reason was most likely the uneven distribution of  
598 the MTs. With a few manual landmarks, often only 3–5, the automatic matching  
599 worked quite well. If the global transformation between two sections was moderate,  
600 the same result could often be achieved with a few manual matches. Finally, for  
601 each section interface, further manual matches or corrections were applied to  
602 achieve the desired quality. An experienced user processed a section interface in  
603 approximately 10 minutes. The complete stack could thus be constructed within one  
604 hour. About 25–35 % of the matches were placed manually. Substantial manual  
605 effort was especially necessary close to the section boundaries in x and y.

606 **Mitotic spindle at anaphase.** This stack consists of a half spindle in early anaphase  
607 in *C. elegans* (Table 1; T0265-42; [5]). The chromatids split and move towards the  
608 poles. The data set includes a half spindle with centrosome. It consists of 25  
609 sections with 1100–4200 MTs per section. However, one section in the middle of  
610 the stack got damaged during sample preparation, and the spindle half of the spindle  
611 could, therefore, not be recorded for this section. The automatic alignment of the  
612 damaged section failed, which also affected the following sections, such that the  
613 stack got distorted in z-direction. With our tool, it was possible to manually steer the  
614 alignment and create a reasonable matching for the uncorrupted data. The stack

615 could be completely constructed. Up to 20 manual landmarks and approximately  
616 100 manual matches were used to compute additional 1100 automatic matched MT  
617 ends. The MT distribution for the 3 sections around the damaged section is 4176,  
618 2134, and 3774, where the one in the middle is the damaged section. It was possible  
619 to handle the two interfaces above and below the damaged section within one hour.

620 **Mitotic spindle at metaphase.** This stack consists of a *C. elegans* spindle in  
621 metaphase (Table 1; T0265-21; [5]). The full spindle shows the chromosomes  
622 located in the center of the cell and attached to a subset of MTs, called kinetochore  
623 MTs. Similar to the anaphase spindle, the data set includes the complete spindle  
624 with centrosomes. The spindle consists of 23 sections with 900–3900 MTs per  
625 section. In contrast to the previous two examples, the quality of the sections was  
626 good. The automatic algorithms worked quite well. We chose this example mainly  
627 to test the performance but also to check if the automatic workflow within the new  
628 tool works for the complete spindle.

## 629 **Performance**

630 **Memory usage.** During alignment and matching, the tool requires memory for the  
631 two tomograms of the selected interface. The alignment and matching can be  
632 performed on an advanced desktop system. For our largest data sets, approximately  
633 10 GB were sufficient. For the creation of the stack in full resolution, approximately  
634  $(n + 1) \cdot k$  memory is required, where  $n$  is the number of sections and  $k$  the size of  
635 the largest tomogram. For our cases, 150 GB was sufficient for the reconstruction  
636 of the largest stacks in full resolution.

637 **Rendering performance.** The interactivity of the application mainly depends on the  
638 performance of the rendering algorithms and the required internal data structure

639 updates. The most expensive part for the visualization is the matching mode, where  
640 three views display both the bottom section and the warped top section with  
641 microtubules. Furthermore, a map depicts the end states of the MTs of the bottom  
642 section. The rendering performance depends mainly on the resolution of the views.  
643 For our tests, we used a desktop computer with an Intel Xeon i7 X5650 processor  
644 (6 cores) and an Nvidia GeForce GTX 1080 Ti graphics card. Amira was run on a  
645 screen with 1920 × 1200 pixels. The view size of all four equally-sized views  
646 together was 1400 × 1000. For small and mid-sized sections, we measured up to  
647 25 frames per second, while for the largest data sets the performance decreased to  
648 12 frames per second. Thus, with default desktop systems, it was possible to align  
649 and match serial sections for all our use cases with interactive frame rates. Since  
650 the most computationally expensive parts are done on the CPU, like the  
651 computation of the intensity values of the slices as well as the warping of the slices  
652 and the microtubules, the CPU represents the bottleneck for the full rendering  
653 pipeline. Compared to this, the rendering of the slices and the ray casting of the MTs  
654 and landmarks is negligible.

## 655 **Discussion**

656 We have demonstrated that the proposed tool solves the matching and alignment  
657 of serial-section tomogram stacks for data sets of different size, number, and  
658 distribution of MTs, including the 3D reconstruction of the full stack as one single  
659 volume data set. An important design decision was that the construction of complete  
660 stacks is decomposed into smaller tasks that solve the alignment and stitching  
661 problem separately for each interface between two neighboring sections. This  
662 seems reasonable based on the assumption that the alignment and matching for

663 one interface is independent from other interfaces. Such a workflow has advantages  
664 for both, the visual design as well as the performance.

## 665 **Visual design**

666 Two z-slices of neighboring sections together with a blended interactive overlay  
667 preview to align neighboring sections has been successfully used for serial sections  
668 images before [7]. Our observations confirm that the approach works well and allows  
669 a user to quickly assess the alignment visually.

670 Due to the low signal-to-noise ratio of electron tomography data, rendering of slices  
671 seems superior to volume rendering or other 3D rendering techniques for image  
672 data. Slice rendering directly displays the intensity values, is straightforward to  
673 implement, and scales reasonably well with image data size. We doubt that 3D  
674 visualizations of the image data would help to improve the alignment and matching.  
675 Moreover, 3D techniques often require more parameter adjustments than slice  
676 rendering, such as transfer functions, and may therefore be more time-consuming  
677 to control in practice.

678 A stack can contain thousands of densely arranged MTs. Visualizing the MTs as 3D  
679 lines for the full stack is inadequate for inspecting the matching at section interfaces.  
680 Due to occlusion, navigation in dense sets of 3D filamentous structures is inherently  
681 difficult. However, if the 3D visualization is restricted to a certain location, it can help  
682 to match the filaments in difficult setups, because the slope of the filaments can be  
683 seen in all directions at once, which is difficult in a single slice. On the other hand,  
684 showing MT ends as overlay of two z-slices allows the user to easily detect patterns  
685 in both sections, which can be more difficult in a 3D visualization that allows arbitrary

686 viewing angles. For this reason, we decided to provide both, a full 2D view of the  
687 filaments within the slice and a local 3D view.

688 For the rendering of MTs, cylinders seem to be superior to thin lines. The  
689 intersection of cylinders with slices creates ellipsoids instead of points. The shape  
690 of the ellipsoids allows one to perceive the slope of the MTs, which helps to detect  
691 corresponding ends.

692 The map that depicts the MT end states was inspired by real-time strategy games.  
693 Most of these games offer a map that is initially black to indicate undiscovered  
694 regions. During the game, the player discovers regions with units. The visited terrain  
695 becomes visible on the map and the black is replaced by map details. Games  
696 usually distinguish further between regions that are currently under control by the  
697 player and regions that were visited before but are currently not under control. While  
698 the latter are usually visualized a bit darker, the others show additional information  
699 such as enemies in the regions. In our case, the bottom section is initialized as an  
700 undiscovered map. Automatic unconfirmed MT ends correspond to 'visited' regions.  
701 The confirmed MT ends correspond to regions 'under control'.

## 702 **Technical aspects**

703 The design decision to restrict the workflow to processing interfaces between two  
704 neighboring sections one after the other has several advantages. Handling data and  
705 rendering of the full stack at once can be avoided. Large-scale image data  
706 visualization could be quite complex and often requires advanced out-of-core  
707 rendering techniques [10]. Since we restricted the design to a single interface,  
708 simple and efficient slice visualizations can be rendered interactively without  
709 complex data handling. The most challenging part is the real-time warping, which

710 we accelerated by grid data structures to achieve interactive frame rates (Section  
711 Result – Technical Aspects – Slice Rendering). We expect that due to this design  
712 even larger tomogram sizes can be handled without major modifications. Because  
713 most visualizations are based on screen-space, the aligner tool should scale  
714 reasonably well with data size. The integration of alternative automatic alignment  
715 and matching algorithms is straightforward, since the design does not use any  
716 advanced data structures.

717 The top left view in alignment mode (Fig 3A) is rotated and translated to  
718 approximately match the warping applied to the overlay viewer. We tested two  
719 approaches for this adjustment before we decided to use the global approach. The  
720 transformation could be calculated either by the whole slice (global) or by the current  
721 view of the bottom section (local). Although the local option more closely  
722 approximates the current local transformation, it is also visually less stable and less  
723 intuitive to use, because the viewer may adjust rapidly during zooming. A global rigid  
724 transformation is more stable and was sufficient in all test cases to display the  
725 corresponding regions in both views.

## 726 **Practical aspects**

727 Especially the interactive visual feedback that shows the current state of alignment  
728 and matching for the section interfaces was important to assess the quality of the  
729 results. For the alignment, we considered our initial design as sufficient. For the  
730 matching, however, we concluded that a stepping tool to confirm MT ends and the  
731 visualization of the MT end state map would be needed.

732 For large number of MTs, it is impossible to check all MT ends per section interface.  
733 To achieve a good distribution over the whole section interface, we decided to

734 compute a random order of the MT ends for the stepping tool. Another idea was to  
735 select an order where the next MT end is always farthest away from all previously  
736 confirmed MT ends with periodic boundary conditions. This could potentially  
737 generate a distribution that would more quickly cover the entire section. It would,  
738 however, require more computation time and seemed irrelevant for our use cases.  
739 Although the stepping tool alone already helped validating the matching, we found  
740 it difficult to estimate the overall matching quality for the entire interface. For this  
741 reason, we introduced the map that depicts the state of the MT ends to give an  
742 impression of the overall progress.

743 Since it is unfeasible to check all MT ends for large numbers of MTs, it is expected  
744 that some errors will remain in the final matching and hence the final alignment.  
745 Therefore, a trade-off has to be made between efficiency and accuracy. Checking a  
746 certain number of MT ends (about 10–25) after being visually satisfied with the  
747 alignment should give the user an idea about the expected quality of the result  
748 According to previously published data, approximately 5% of MTs needed to be  
749 corrected [5]. These corrections included the manual tracing of undetected MTs, the  
750 connection of MTs and deletions of tracing artifacts (for example, membranes of  
751 vesicles).

752 Application of our approach indicated that the position and orientation of the side  
753 views are very helpful. The lines primarily help in two ways. First, they provide a  
754 visual link between the overlay view and the side view, and second, the selected  
755 MT end is highlighted by aatcross (i.e. where the two lines intersect) and thus easier  
756 to inspect.



757 Originally, the automatically computed landmarks were maintained separately from  
758 the matching process. The coherent point drift algorithm could be applied completely  
759 independently from the matching, as in the fully automatic pipeline [4]. We observed  
760 that this separation was confusing in practice. The landmarks are computed based  
761 on the geometry of the MT ends in the matching region and thus conceptually belong  
762 to the MT ends. We observed that users either accepted these landmarks or rejected  
763 them, because the alignment completely failed. They rarely modified the automatic  
764 landmarks. For this reason, we decided to move the original alignment into a hidden  
765 pre-processing step before the automatic matching, which is only computed if no  
766 automatic landmarks are available (during initialization or when a user decides to  
767 delete all automatic landmarks). We observed that if the alignment fails, the  
768 matching also fails, and users rejected both. They then placed manual landmarks in  
769 combination with a few manual matches, which improved the next automatic  
770 matching computation without the automatic alignment. In combination with this  
771 workflow, we decided to always recompute the automatic landmarks after the  
772 matching for two main reasons. First, only matched MT ends should create  
773 landmarks, because the other MT ends possibly do not belong to each other.  
774 Second, during the manual matching, one can directly see the corresponding  
775 alignment changes due to the new landmark. This intuitive workflow combines local  
776 alignment and matching into a single control handle. Thus, the manual and  
777 automated matching can be applied iteratively to progress towards the best  
778 achievable stitching result. It was possible to create reasonable solutions even for  
779 cases where the fully automatic stitching process failed.

## 780 **Conclusions**

781 In this paper, we have presented a tool to align serial tomograms in combination  
782 with the stitching of filamentous structures, specifically MTs in reconstructions of  
783 both mitotic and meiotic spindles. This tool allows users to visually validate the  
784 stitching process and support the automatic algorithms by placing manual  
785 landmarks and matches. Cases, in which the fully automatic workflow fails can now  
786 be solved with a reasonable investment of manual labor because a user can steer  
787 the whole process of stitching a stack of serial tomograms.

788 While stitching sections, minor errors of the tracing are often identified. For example,  
789 falsely traced MTs or erroneously connected MTs could be detected. Currently, it is  
790 not possible to edit the MT geometry with our tool. Users need to improve the MT  
791 tracing either before or after the stitching. It would be helpful to add such a  
792 functionality. This would allow users to immediately correct errors in the process of  
793 MT segmentation. For example, operations would be possible to add, split, remove,  
794 or merge MTs.

795 An open question is the computation or manual estimation of the gap between two  
796 adjacent sections. Currently, we expect that the user crops the tomograms in z-  
797 direction such that they fit seamlessly. It could be helpful to support setting the  
798 cropping regions interactively for each interface in the tool. This would probably  
799 improve the selection of cropping parameters, thus improving the overall alignment  
800 and matching procedure. It should be possible to compute good cropping  
801 parameters automatically from confirmed matches. In the future, this will need to be  
802 implemented in a version of the software package to come.

## 803 **Materials and methods**

### 804 **Software availability and requirements**

805 The described tool is available at <https://www.zib.de/software/serial-section-aligner>  
806 as an Amira custom module. To execute the tool, a commercial version of Amira  
807 (currently version 2019.2) is required. A free demo version can usually be obtained  
808 from Thermo Fisher Scientific upon request for a limited duration. As stated  
809 previously, performance tests were carried out on a desktop computer with an Intel  
810 Xeon i7 X5650 processor (6 cores) and an Nvidia GeForce GTX 1080 Ti graphics  
811 card. This hardware was sufficient to perform all interactive data processing at real  
812 time. 128 GB RAM were required to process the final stitching of the larger serial  
813 section tomogram stacks given in Table 1. If larger data sets are to be processed, it  
814 is recommended to increase the RAM. Moreover, a larger number of CPU cores  
815 could further improve processing performance.

### 816 **High-pressure freezing (HPF), freeze substitution (FS) and thin-layer** 817 **embedding**

818 Embryos, hermaphrodites and males and of wild-type *C. elegans* were prepared for  
819 high-pressure freezing as described previously [17-20]. HeLa cells were grown and  
820 frozen on Sapphire discs as reported [21]. Briefly, samples for the projects as listed  
821 in Table 1 were cryo-immobilized by using the following high-pressure freezers:  
822 EMPACT2+RTS (Leica Microsystems, Vienna, Austria), Leica EM ICE (Leica  
823 Microsystems, Vienna, Austria), HPF Compact 01 (M. Wohlwend, Sennwald,  
824 Switzerland). Freeze substitution was performed over 3 days at  $-90^{\circ}\text{C}$  in anhydrous  
825 acetone containing 1 %  $\text{OsO}_4$  and 0.1 % uranyl acetate using an automatic freeze  
826 substitution machine (EM AFS, Leica Microsystems, Vienna, Austria) Serial semi-

827 thick sections (300nm) of Epon/Araldite-embedded samples were cut using an  
828 Ultracut UCT Microtome (Leica Microsystems, Vienna, Austria). Sections were  
829 collected on Formvar-coated copper slot grids and poststained with 2 % uranyl  
830 acetate in 70 % methanol followed by Reynold's lead citrate.

### 831 **Electron tomography**

832 Dual-axis electron tomography was performed as described [22]. Briefly, 20 nm-  
833 colloidal gold particles (Sigma-Aldrich) were attached to both sides of semi-thick  
834 sections collected on copper slot grids to serve as fiducial markers for subsequent  
835 image alignment. For electron tomography, series of tilted views were recorded  
836 using a TECNAI F30 transmission electron microscope (Thermo Fisher Scientific,  
837 Hillsboro, USA) operated at 300 kV. Images were captured every 1.0° over a ±60°  
838 range and a pixel size of 2.3 nm using a Gatan US1000 CCD camera (2k x 2k). For  
839 each serial section two montages were collected and combined to a supermontage  
840 using the IMOD software package [6] to cover the pole-to-pole distance of the  
841 spindles. For image processing the tilted views were aligned using the positions of  
842 the colloidal gold particles as fiducial markers. Tomograms were computed for each  
843 tilt axis using the R-weighted back-projection algorithm. For double-tilt data sets,  
844 montages of tomograms were aligned to each other and combined to a  
845 supermontage [22]. The number of tomograms and serial sections used for each  
846 presented data set are listed in Table 1.

### 847 **Acknowledgments**

848 We are grateful to T. Fürstenhaupt (EM facility, Max Planck Institute of Molecular  
849 Cell Biology and Genetics, MPI-CBG) for continuous technical support. We also

850 would like to thank I. Lantzsch, E. Szentgyörgyi and M. Kirchner for providing spindle  
851 data sets and comprehensive user feedback.

852

## 853 **Author Contributions**

854 Conceptualization: NL, VJD, SP, TMR, DB.

855 Data curation: NL, GF, RK, SR.

856 Formal analysis: NL, FNB, VJD.

857 Funding acquisition: SP, TMR.

858 Investigation: NL, GF, RK, SR.

859 Methodology: NL, VJD, SP, DB.

860 Project administration: SP, TMR.

861 Resources: SP, TMR.

862 Software: NL, FNB, SP, DB.

863 Supervision: SP, DB.

864 Validation: GF, RK, SR.

865 Visualization: NL, SP, DB.

866 Writing – original draft: NL, SP.

867 Writing – review & editing: NL, VJD, FNB, SP, GF, RK, SR, TMR, DB.

## 868 **References**

- 869 1. Muller-Reichert T, Kiewisz R, Redemann S. Mitotic spindles revisited - new  
870 insights from 3D electron microscopy. *J Cell Sci.* 2018;131(3). doi:  
871 10.1242/jcs.211383. PubMed PMID: 29382699.
- 872 2. Redemann S, Furthauer S, Shelley M, Muller-Reichert T. Current approaches  
873 for the analysis of spindle organization. *Curr Opin Struct Biol.* 2019;58:269-77. Epub  
874 2019/07/08. doi: 10.1016/j.sbi.2019.05.023. PubMed PMID: 31279499.
- 875 3. Weber B, Greenan G, Prohaska S, Baum D, Hege H-C, Müller-Reichert T, et  
876 al. Automated tracing of microtubules in electron tomograms of plastic embedded  
877 samples of *C. elegans* embryos. *J Struct Biol.* 2012;178:129-38.
- 878 4. Weber B, Tranfield EM, Hoog JL, Baum D, Antony C, Hyman T, et al.  
879 Automated stitching of microtubule centerlines across serial electron tomograms.  
880 *PloS one.* 2014;9(12):e113222. doi: 10.1371/journal.pone.0113222. PubMed PMID:  
881 25438148; PubMed Central PMCID: PMC4249889.
- 882 5. Redemann S, Baumgart J, Lindow N, Shelley M, Nazockdast E, Kratz A, et  
883 al. *C. elegans* chromosomes connect to centrosomes by anchoring into the spindle  
884 network. *Nat Commun.* 2017;8:15288. doi: 10.1038/ncomms15288. PubMed PMID:  
885 28492281.
- 886 6. Kremer JR, Mastronarde DN, McIntosh JR. Computer visualization of three-  
887 dimensional image data using IMOD. *J Struct Biol.* 1996;116(1):71-6. PubMed  
888 PMID: 8742726.
- 889 7. Anderson JR, Jones BW, Yang JH, Shaw MV, Watt CB, Koshevoy P, et al. A  
890 computational framework for ultrastructural mapping of neural circuitry. *PLoS Biol.*  
891 2009;7(3):e1000074. Epub 2009/10/27. doi: 10.1371/journal.pbio.1000074.  
892 PubMed PMID: 19855814; PubMed Central PMCID: PMC2661966.

- 893 8. Berlanga ML, Phan S, Bushong EA, Wu S, Kwon O, Phung BS, et al. Three-  
894 dimensional reconstruction of serial mouse brain sections: solution for flattening  
895 high-resolution large-scale mosaics. *Front Neuroanat.* 2011;5:17. Epub 2011/06/02.  
896 doi: 10.3389/fnana.2011.00017. PubMed PMID: 21629828; PubMed Central  
897 PMCID: PMCPMC3096995.
- 898 9. Cardona A, Saalfeld S, Schindelin J, Arganda-Carreras I, Preibisch S,  
899 Longair M, et al. TrakEM2 software for neural circuit reconstruction. *PloS one.*  
900 2012;7(6):e38011. Epub 2012/06/23. doi: 10.1371/journal.pone.0038011. PubMed  
901 PMID: 22723842; PubMed Central PMCID: PMCPMC3378562.
- 902 10. Beyer J, Hadwiger M, Al-Awami A, Jeong WK, Kasthuri N, Lichtman JW, et  
903 al. Exploring the connectome: petascale volume visualization of microscopy data  
904 streams. *IEEE Comput Graph Appl.* 2013;33(4):50-61. Epub 2014/05/09. doi:  
905 10.1109/MCG.2013.55. PubMed PMID: 24808059; PubMed Central PMCID:  
906 PMCPMC4296712.
- 907 11. Ai-Awami AK, Beyer J, Haehn D, Kasthuri N, Lichtman JW, Pfister H, et al.  
908 NeuroBlocks--Visual Tracking of Segmentation and Proofreading for Large  
909 Connectomics Projects. *IEEE Trans Vis Comput Graph.* 2016;22(1):738-46. Epub  
910 2015/11/04. doi: 10.1109/TVCG.2015.2467441. PubMed PMID: 26529725.
- 911 12. Dercksen VJ, Hege HC, Oberlaender M. The Filament Editor: an interactive  
912 software environment for visualization, proof-editing and analysis of 3D neuron  
913 morphology. *Neuroinformatics.* 2014;12(2):325-39. Epub 2013/12/11. doi:  
914 10.1007/s12021-013-9213-2. PubMed PMID: 24323305.
- 915 13. Stalling D, Westerhoff M, Hege H-C. Amira: a highly interactive system for  
916 visual data analysis. In: Hansen CD, Johnson CR, editors. *The Visualization*  
917 *Handbook*: Elsevier; 2005. p. 749–67.



- 918 14. Harrower M, Brewer CA. ColorBrewer.org: an online tool for selecting colour  
919 schemes for maps. *Cartographic Journal*. 2003;40:27-37.
- 920 15. Schaefer S, McPhail T, Warren JD. Image deformation using moving least  
921 squares. *ACM Trans Graph*. 2006;25(3):533–40.
- 922 16. Sigg C, Weyrich T, Botsch M, Gross M, editors. GPU-based ray-casting of  
923 quadratic surfaces. *Eurographics Symposium on Point-Based Graphics*; 2006: The  
924 Eurographics Association.
- 925 17. Muller-Reichert T, Hohenberg H, O'Toole ET, McDonald K.  
926 Cryoimmobilization and three-dimensional visualization of *C. elegans* ultrastructure.  
927 *J Microsc*. 2003;212(Pt 1):71-80. PubMed PMID: 14516364.
- 928 18. Muller-Reichert T, Srayko M, Hyman A, O'Toole ET, McDonald K. Correlative  
929 light and electron microscopy of early *Caenorhabditis elegans* embryos in mitosis.  
930 *Methods Cell Biol*. 2007;79:101-19. Epub 2007/03/01. doi: S0091-679X(06)79004-  
931 5 [pii]  
932 10.1016/S0091-679X(06)79004-5. PubMed PMID: 17327153.
- 933 19. Woog I, White S, Buchner M, Srayko M, Muller-Reichert T. Correlative light  
934 and electron microscopy of intermediate stages of meiotic spindle assembly in the  
935 early *Caenorhabditis elegans* embryo. *Methods Cell Biol*. 2012;111:223-34. doi:  
936 10.1016/B978-0-12-416026-2.00012-1. PubMed PMID: 22857931.
- 937 20. Fabig G, Schwarz A, Striese C, Laue M, Müller-Reichert T. *In situ* analysis of  
938 male meiosis in *C. elegans*. *Methods Cell Biol*. 2019;152:119-34. doi:  
939 <https://doi.org/10.1016/bs.mcb.2019.03.013>.
- 940 21. Guizetti J, Schermelleh L, Mantler J, Maar S, Poser I, Leonhardt H, et al.  
941 Cortical constriction during abscission involves helices of ESCRT-III-dependent  
942 filaments. *Science*. 2011;331(6024):1616-20. Epub 2011/02/12. doi:  
943 science.1201847 [pii]

- 944 10.1126/science.1201847. PubMed PMID: 21310966.
- 945 22. Mastronarde DN. Dual-axis tomography: an approach with alignment  
946 methods that preserve resolution. *J Struct Biol.* 1997;120(3):343-52. PubMed PMID:  
947 9441937.
- 948 23. Redemann S, Lantzsch I, Lindow N, Prohaska S, Srayko M, Muller-Reichert  
949 T. A Switch in Microtubule Orientation during *C. elegans* Meiosis. *Current biology :*  
950 *CB.* 2018;28(18):2991-7. doi: 10.1016/j.cub.2018.07.012. PubMed PMID:  
951 30197085.
- 952 24. Fabig G, Kiewisz R, Lindow N, Powers JA, Cota V, Quintanilla LJ, et al. Male  
953 meiotic spindle features that efficiently segregate paired and lagging chromosomes.  
954 *Elife.* 2020;9. Epub 2020/03/10. doi: 10.7554/eLife.50988. PubMed PMID:  
955 32149606.
- 956 25. Baumgart J, Kirchner M, Redemann S, Bond A, Woodruff J, Verbavatz JM,  
957 et al. Soluble tubulin is significantly enriched at mitotic centrosomes. *J Cell Biol.*  
958 2019;218(12):3977-85. Epub 2019/10/23. doi: 10.1083/jcb.201902069. PubMed  
959 PMID: 31636117; PubMed Central PMCID: PMC6891098.
- 960
- 961

## 962 **Figures**

963 **Fig 1. Cell division and three-dimensional spindle reconstruction.** (A)  
964 Schematic illustration of mitotic stages: (a) prophase, (b) prometaphase, (c)  
965 metaphase, (d) anaphase, and (e) telophase with subsequent cytokinesis. During  
966 mitosis in animal cells, microtubules (green lines) connect the centrosomes (green  
967 circles) and the chromosomes (blue). The nuclear envelope (orange) is usually  
968 disassembled during mitosis. (B) Pipeline for the reconstruction of a mitotic spindle:  
969 (a) specimen with microtubules (lines) and other cellular components (circles), (b)  
970 physical cutting and imaging of the specimen leading to a stack of distorted serial  
971 sections (c). segmentation of cellular features within the flattened sections, and (d)  
972 stitching of tomograms to match filaments. (C) Completely aligned and stitched  
973 mitotic spindle at metaphase in the early embryo of the nematode *C. elegans* with  
974 approximately 27000 microtubules shown in green and red. The spindle was  
975 reconstructed from 23 serial tomograms (Table 1, T0265-21). Chromosomes are  
976 shown in blue, kinetochore microtubules in red [5].

977 **Fig 2. Graphical user interface and recommended workflow.** (A) Graphical user  
978 interface of the aligner module. The blue part is only visible for the alignment mode,  
979 the red part only for the matching mode. (B) Recommended workflow for the  
980 stitching process. Observation tasks (green boxes) lead to operations (blue boxes).  
981 The most frequently used cycles are highlighted (gray circular arrows).

982 **Fig 3. The four views of the alignment mode.** (A) Z-slice of the top section with a  
983 warping preview as overlay view. (B) Bottom section. (C) Abstract visualization of  
984 the full stack. (D) Selected interface with a vertical histogram of the end point  
985 density.

986 **Fig 4. The four views of the matching mode.** (A) Local 3D view. (B) Orthogonal  
987 side view. (C) Warped overlay of the bottom and the top section. (D) Matching state  
988 map of the microtubule ends of the bottom section.

989 **Fig 5. Fully automatic approach vs. semi-automatic workflow.** (A) Failure of the  
990 automatic matching in the given region, but one can clearly see the matching  
991 patterns for the MT ends. According to this, a shift of the top tomogram (blue) up  
992 and slightly to the right would be required (Table 1, T0265-42). (B) By adding two  
993 manual matches (in green) the automatic matching for the complete region worked.  
994 (C) Alignment result of the original automatic pipeline in a *C. elegans* prometaphase  
995 data set of one section interface (Table 1, T0345-11). (D) The problem was solved  
996 by adding a few manual filaments matches.

997 **Fig 6. Warping of the z-slice of the top section.** (A) Generation of a 2D grid in the  
998 space of the bottom section that fills the complete view. (B) Transformation of the  
999 grid to the space of the top section. (C) Approximation of all visible points of the  
1000 bottom section by a bilinear interpolation in the transformed grid. The intensity value  
1001 is then captured and blended with the bottom section.

1002 **Fig 7. Filament end state map.** Dark regions correspond to unmatched  
1003 unconfirmed filament ends, bright regions to confirmed ends, and the ends with  
1004 medium brightness are automatically matched but not confirmed.

1005 **Fig 8. Three-dimensional reconstructions of spindles from different biological**  
1006 **samples.** Tomographic stacks are shown on the left, 3D reconstructions of the  
1007 corresponding spindles on the right. (A) Anaphase I of oocyte meiosis in *C. elegans*  
1008 (Table 1, T0208-1) [23]. (B) Anaphase I of spermatocyte meiosis in *C. elegans*  
1009 males (Table 1, T0391-2) [24]. (C) Metaphase in mitotic HeLa cell (Table 1, T0475).

1010 (D) Metaphase of the first mitotic division in the *C. elegans* embryo (Table 1, T0265-  
1011 21) [5].

1012

## 1013 **Video**

1014 **Video S1. Serial Section Aligner.** This video shows how the software tool  
1015 described in this publication can be applied to stitch filamentous structures in image  
1016 stacks from serial-section electron tomography. The video is subdivided into the  
1017 following parts (times are given in parentheses): (1) Stack creation (00:07-00:29);  
1018 (2) Navigation (00:30-01:46); (3) Alignment (01:47-02:46); (4) Matching (02:47-  
1019 03:58); (5) Check matching (03:59-05:20); (6) Build stack (05:21-06:44).

1020

1021 **Table 1. Summary of data sets as used throughout this study.**

| <b>Data set</b>    | <b>No. of sections</b> | <b>Size (GB)</b> | <b>No. of MTs</b> |
|--------------------|------------------------|------------------|-------------------|
| Nocodazole-1 [25]  | 17                     | 8.2              | 248               |
| Nocodazole-2 [25]  | 14                     | 6.4              | 299               |
| T0208-1 [23]       | 20                     | 11.4             | 3723              |
| T0252 [5]          | 24                     | 13.6             | 3581              |
| T0265-21 [5]       | 23                     | 79.3             | 27051             |
| T0265-41 [5]       | 15                     | 28.7             | 11801             |
| T0265-42 [5]       | 25                     | 93.1             | 12205             |
| T0265 [5]          | 15                     | 36.4             | 8774              |
| T0275-1 [25]       | 13                     | 9.6              | 1511              |
| T0275-3 [25]       | 7                      | 9.2              | 1132              |
| T0275-5 [25]       | 6                      | 9.7              | 505               |
| T0275-9 [25]       | 13                     | 8.0              | 1289              |
| T0275-10 [25]      | 14                     | 8.9              | 1503              |
| T0345-11 [5]       | 7                      | 10.7             | 1892              |
| T0391-1 [24]       | 6                      | 2.8              | 246               |
| T0391-2 [24]       | 11                     | 10.1             | 1403              |
| T0391-3 [24]       | 14                     | 9.0              | 1611              |
| T0391-4 [24]       | 5                      | 1.9              | 671               |
| T0391-5 [24]       | 8                      | 3.2              | 893               |
| T0391-6 [24]       | 17                     | 16.9             | 2553              |
| T0391-7 [24]       | 25                     | 16.4             | 2212              |
| T0391-8 [24]       | 11                     | 9.5              | 2418              |
| T0475 <sup>1</sup> | 22                     | 47.6             | 4884              |

|                    |    |      |      |
|--------------------|----|------|------|
| T0479 <sup>1</sup> | 29 | 79.8 | 8051 |
|--------------------|----|------|------|

1022 <sup>1</sup> Unpublished data sets (R. Kiewisz).

1023

A

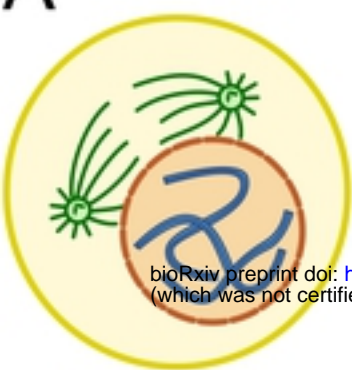

(a)

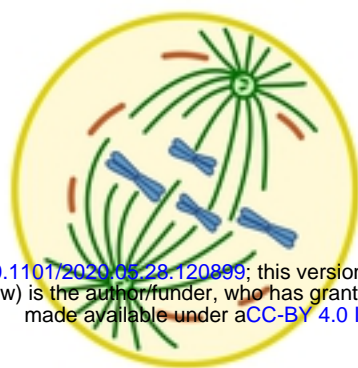

(b)

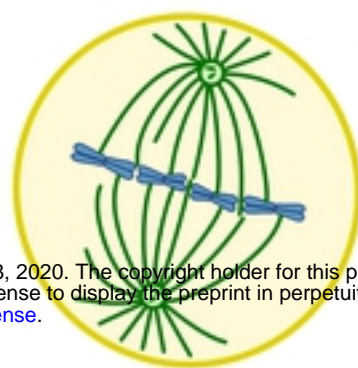

(c)

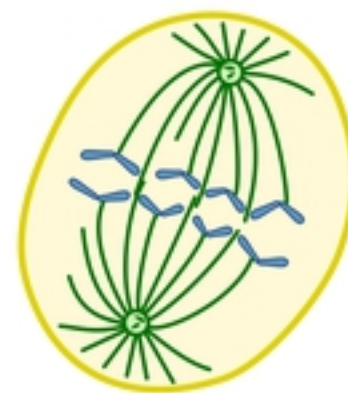

(d)

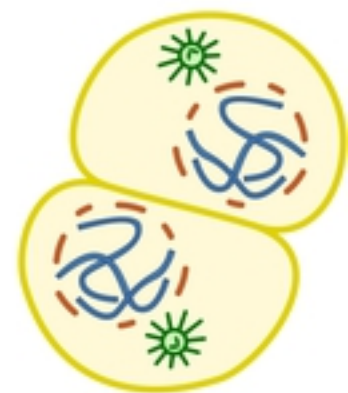

(e)

bioRxiv preprint doi: <https://doi.org/10.1101/2020.05.28.120899>; this version posted May 28, 2020. The copyright holder for this preprint (which was not certified by peer review) is the author/funder, who has granted bioRxiv a license to display the preprint in perpetuity. It is made available under aCC-BY 4.0 International license.

B

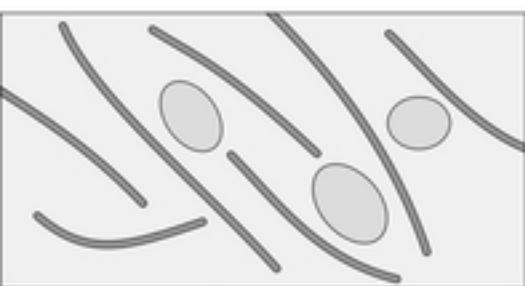

(a)

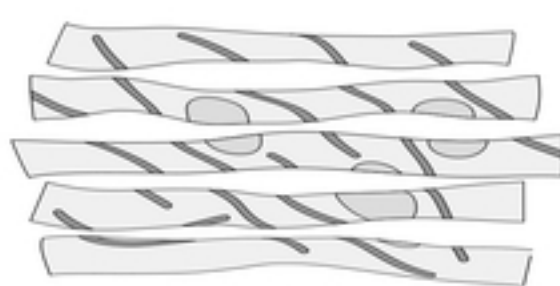

(b)

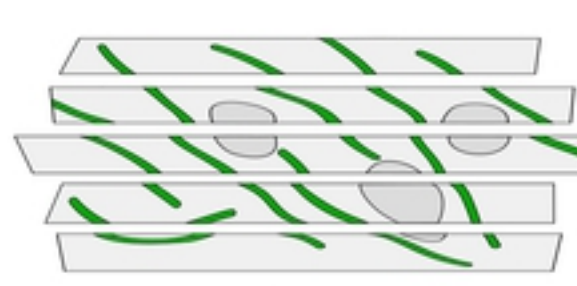

(c)

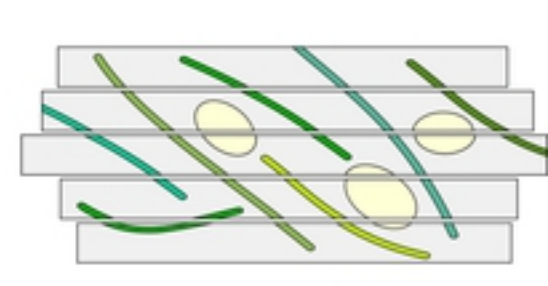

(d)

C

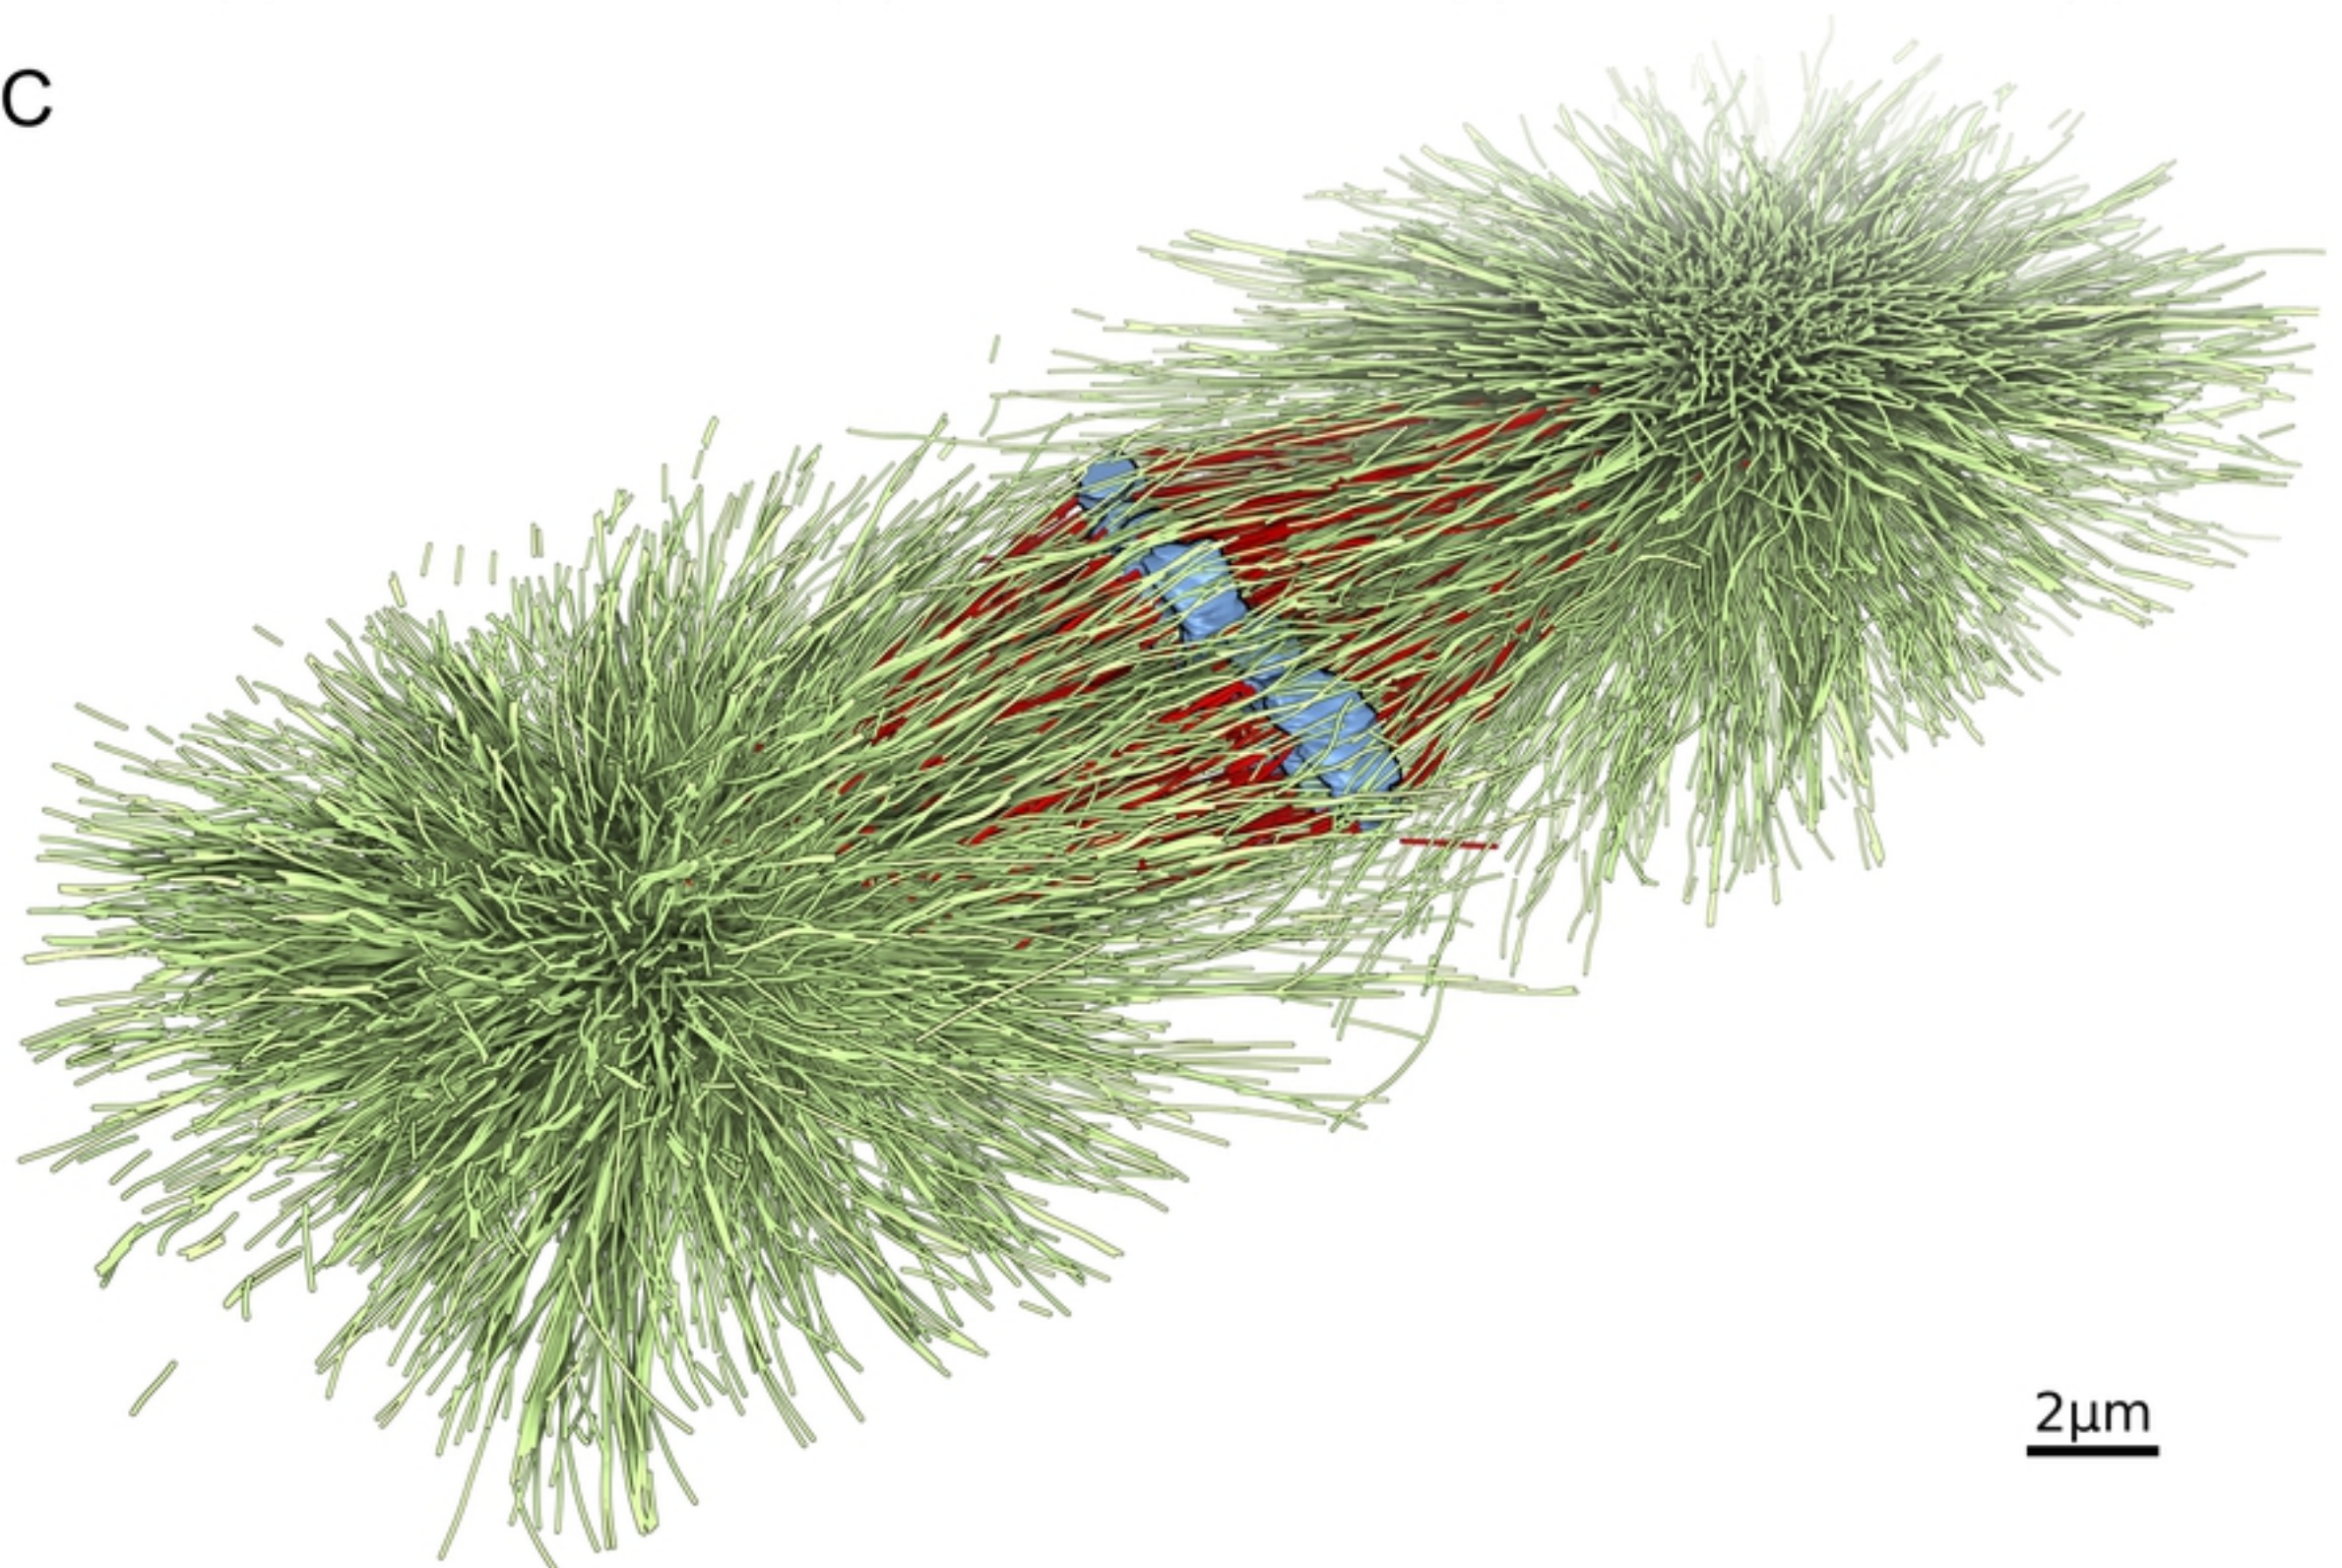

2 μm



A

SerialSectionAligner

Data: SerialSectionStack.am

Mode:  alignment  matching

**General Properties**

Section Interface: 0

Slice Position Top: 0.0649351

Slice Position Bottom: 0.935065

Microtubules Scale: 1.08636

Synchronize Slices:

**Landmark Properties**

Landmark Scale: 1

Landmark Show:  grid

Landmarks Delete: manual automatic

**Matching Properties**

Matching: compute clear  automatic landmarks

Matching Region: 0.4

Matching Check: < > confirm 2/332

Cut Radius: 4818.18

**Stack Properties**

Select Section: 1

Compute Stack: create  tomograms

Voxel Size X-Y: 23.2 1648 MB

B

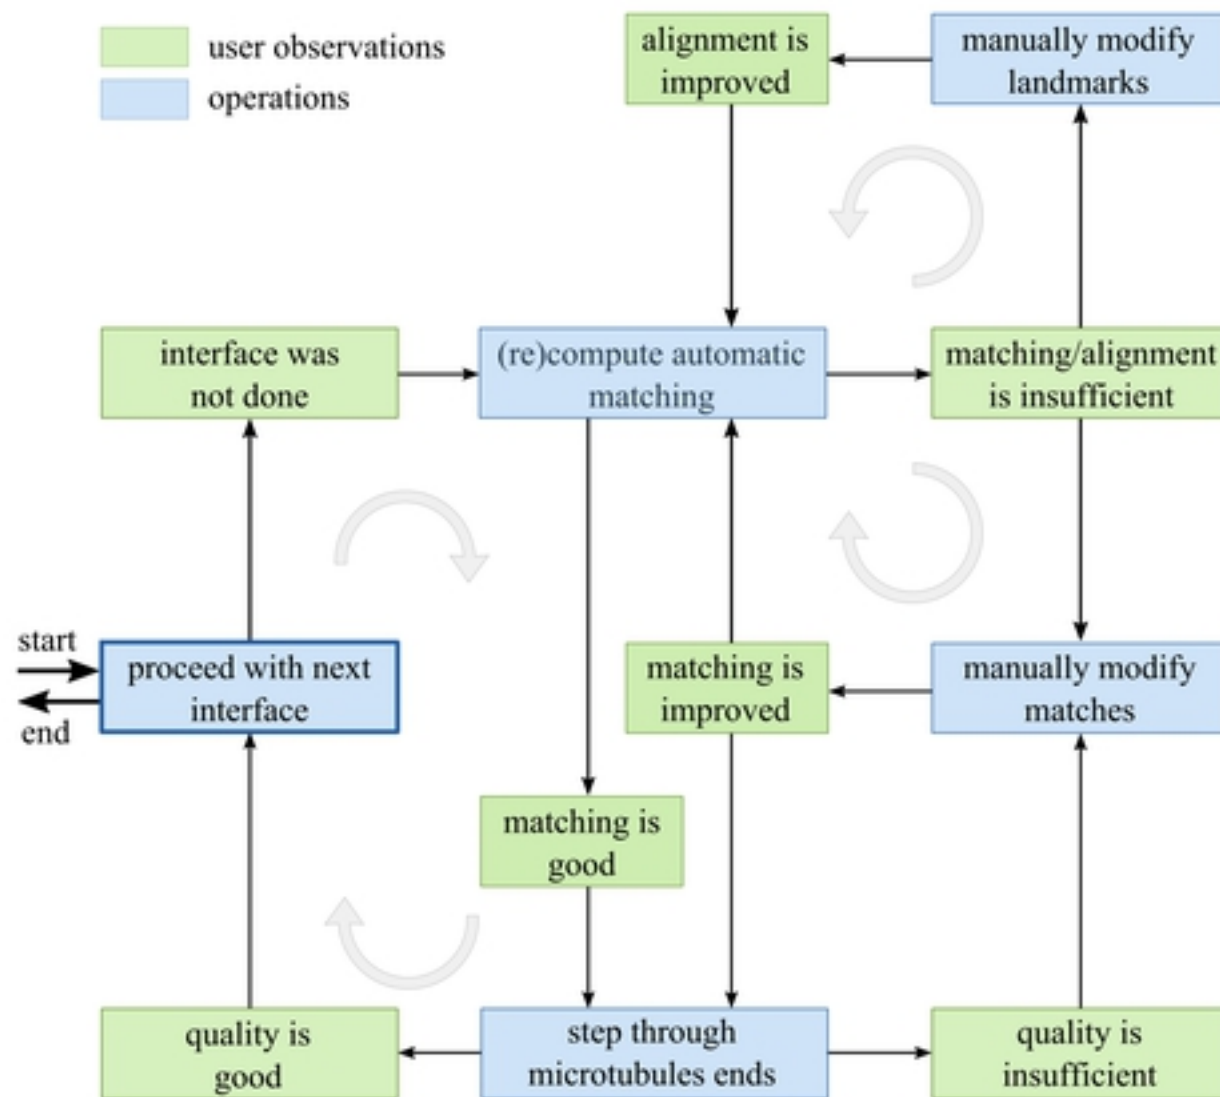

A

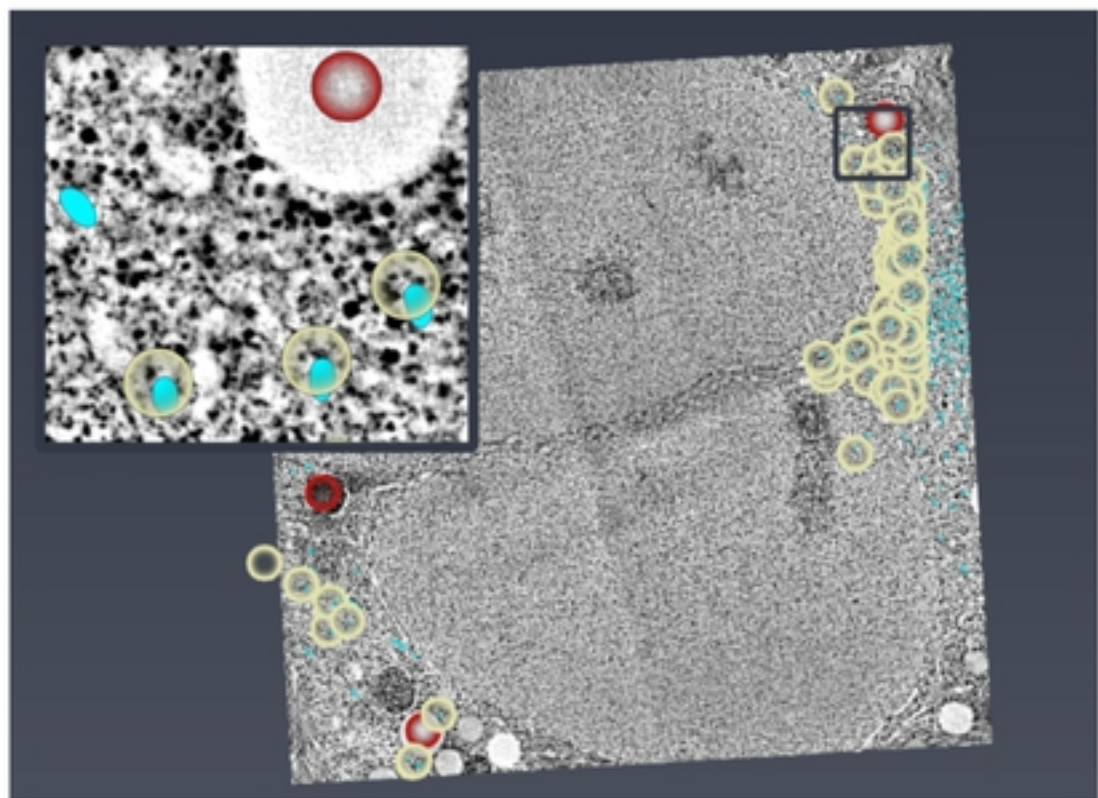

B

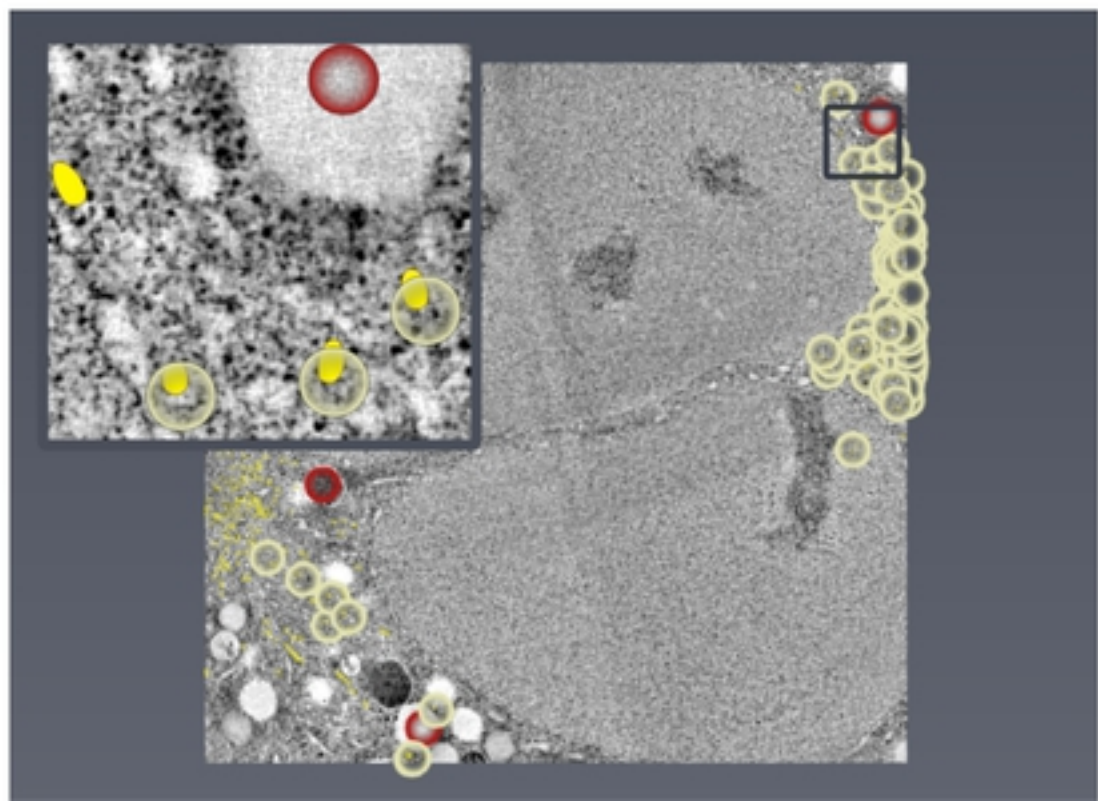

C

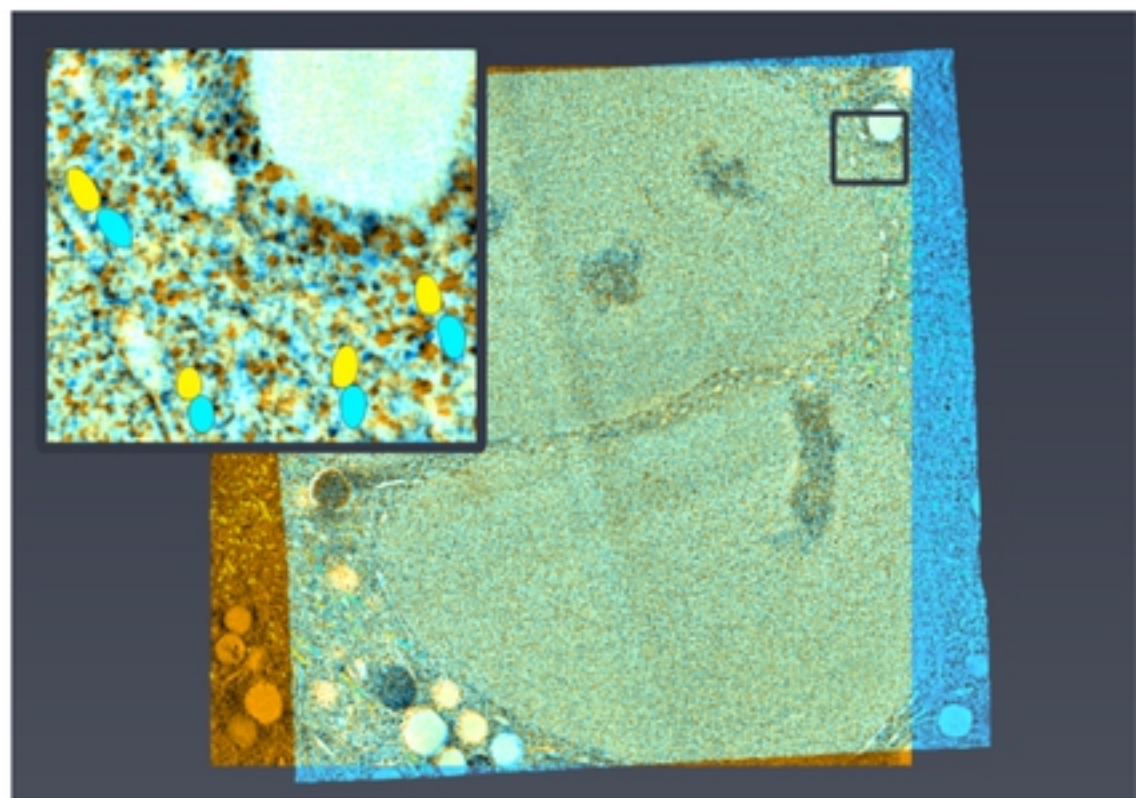

D

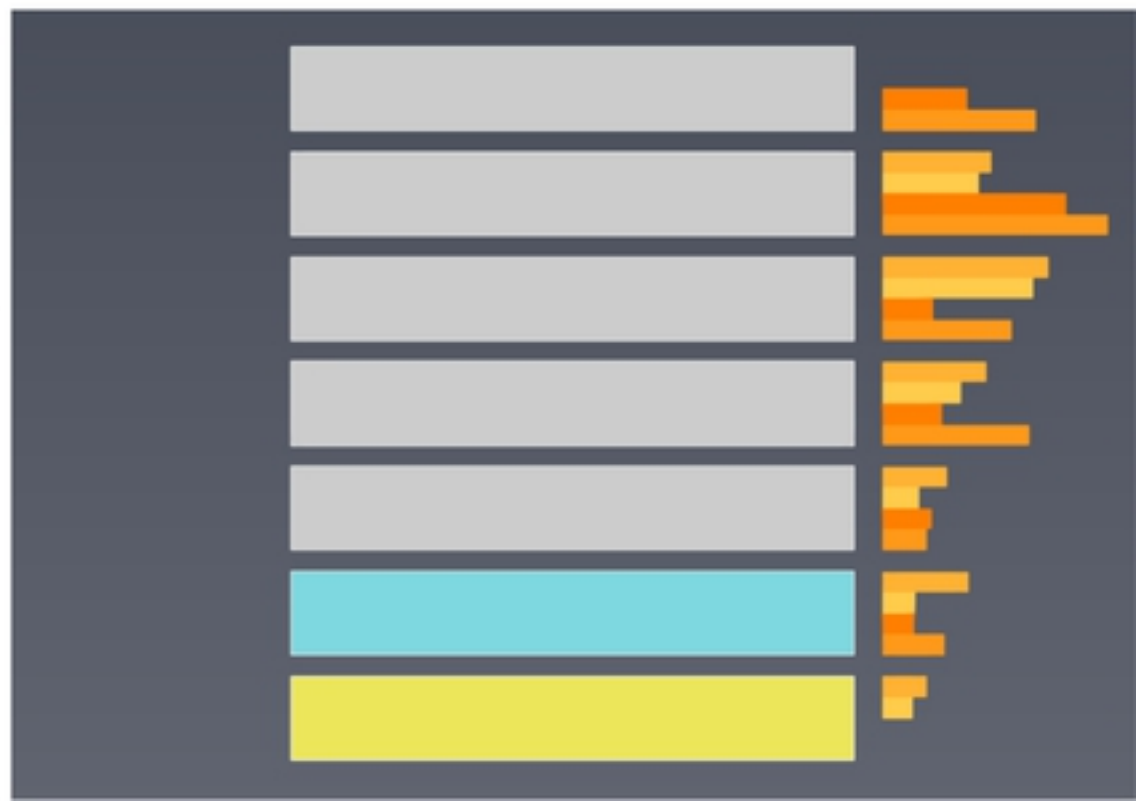

A

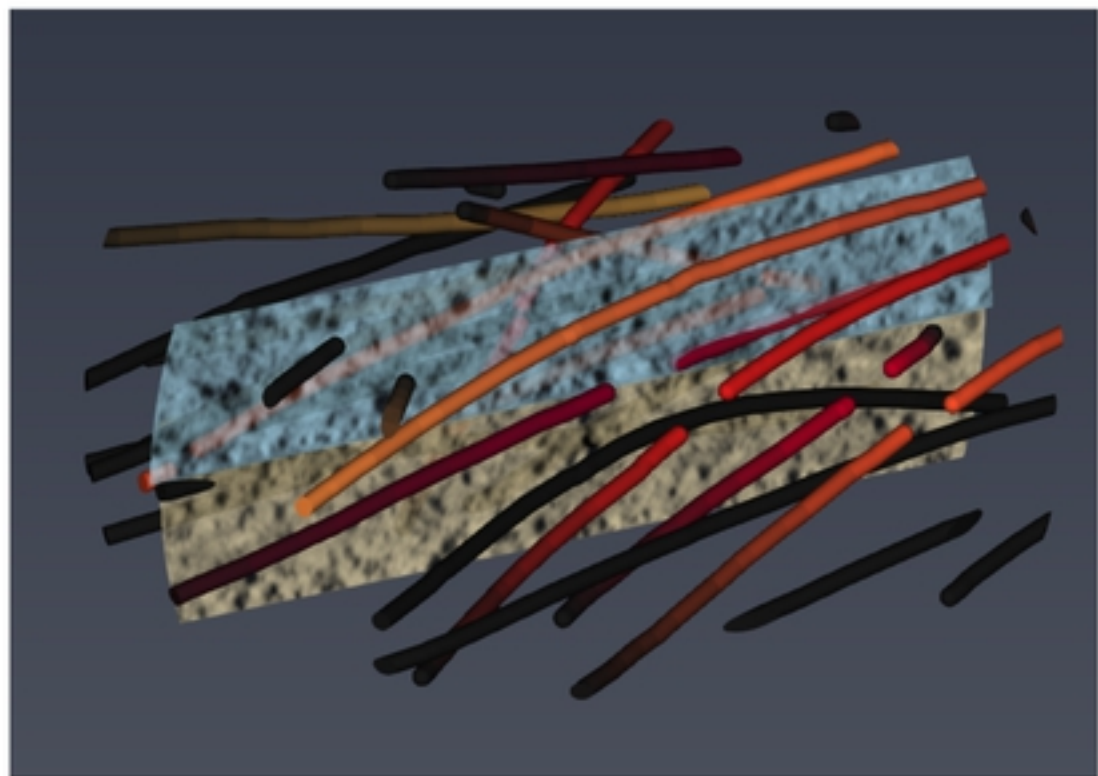

B

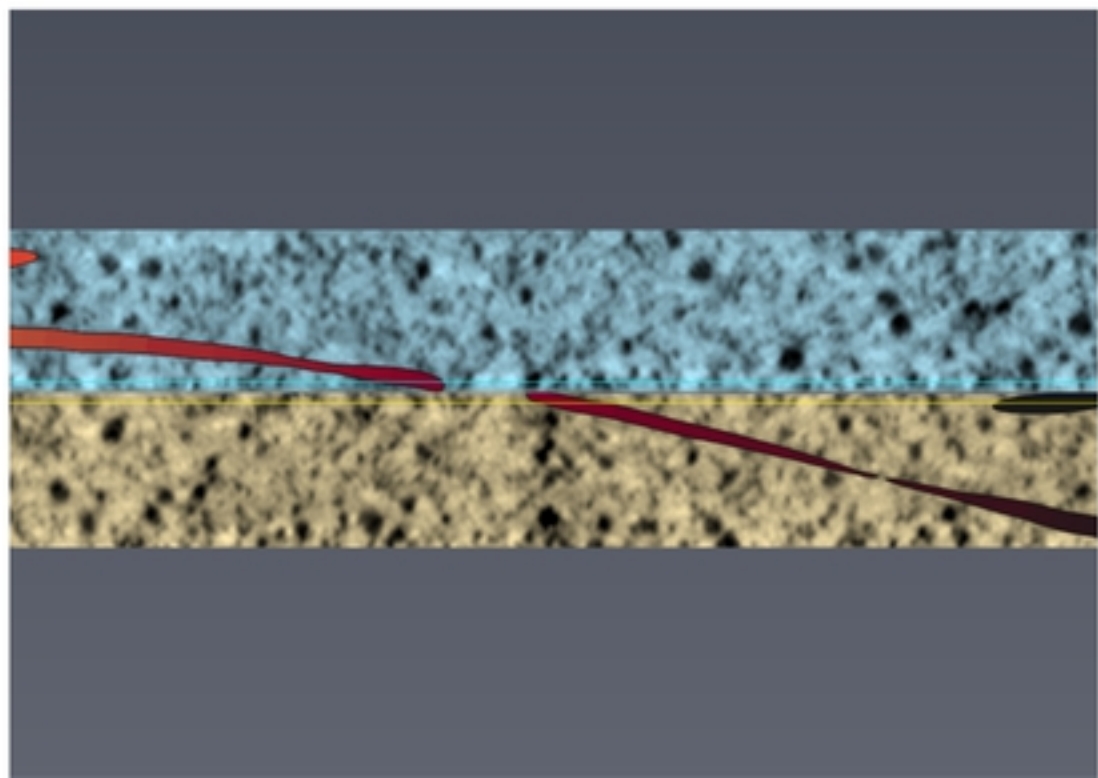

C

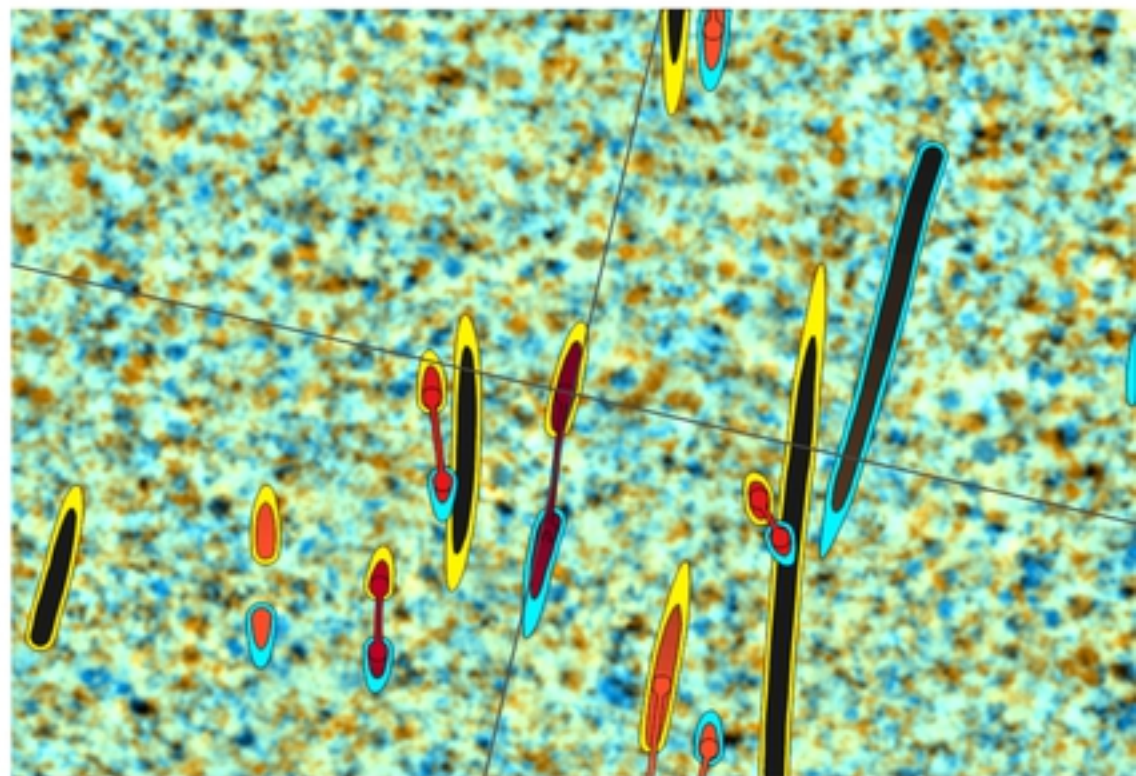

D

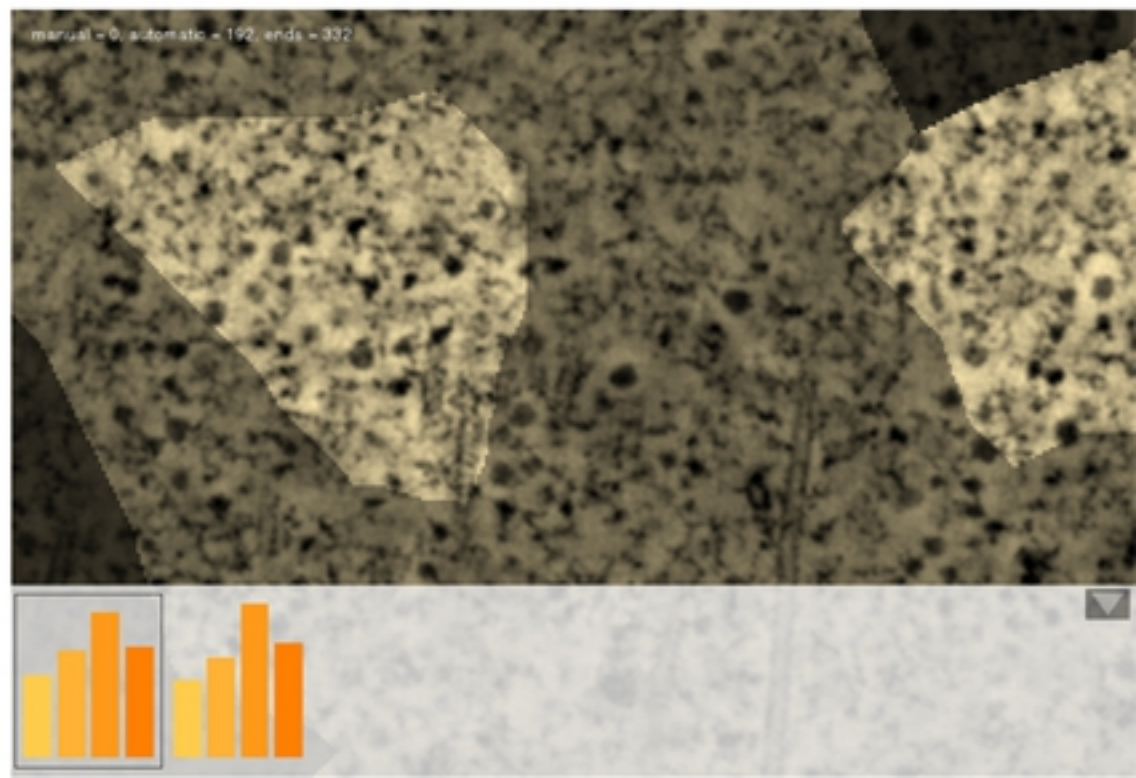

A

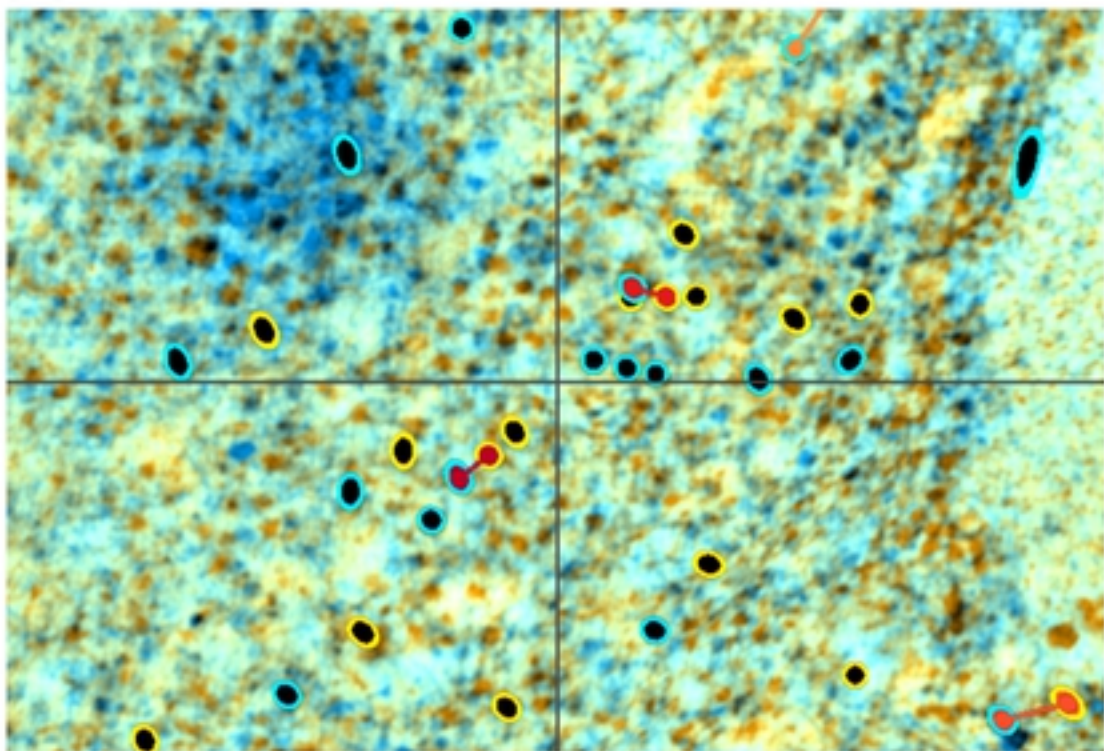

B

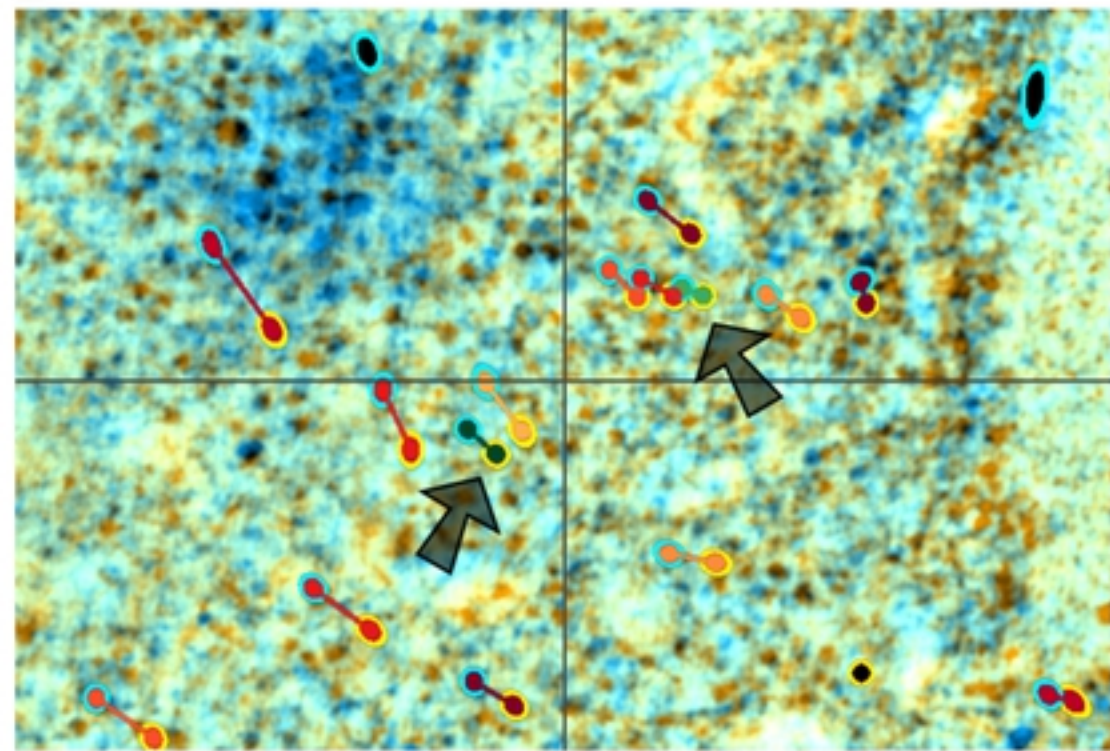

C

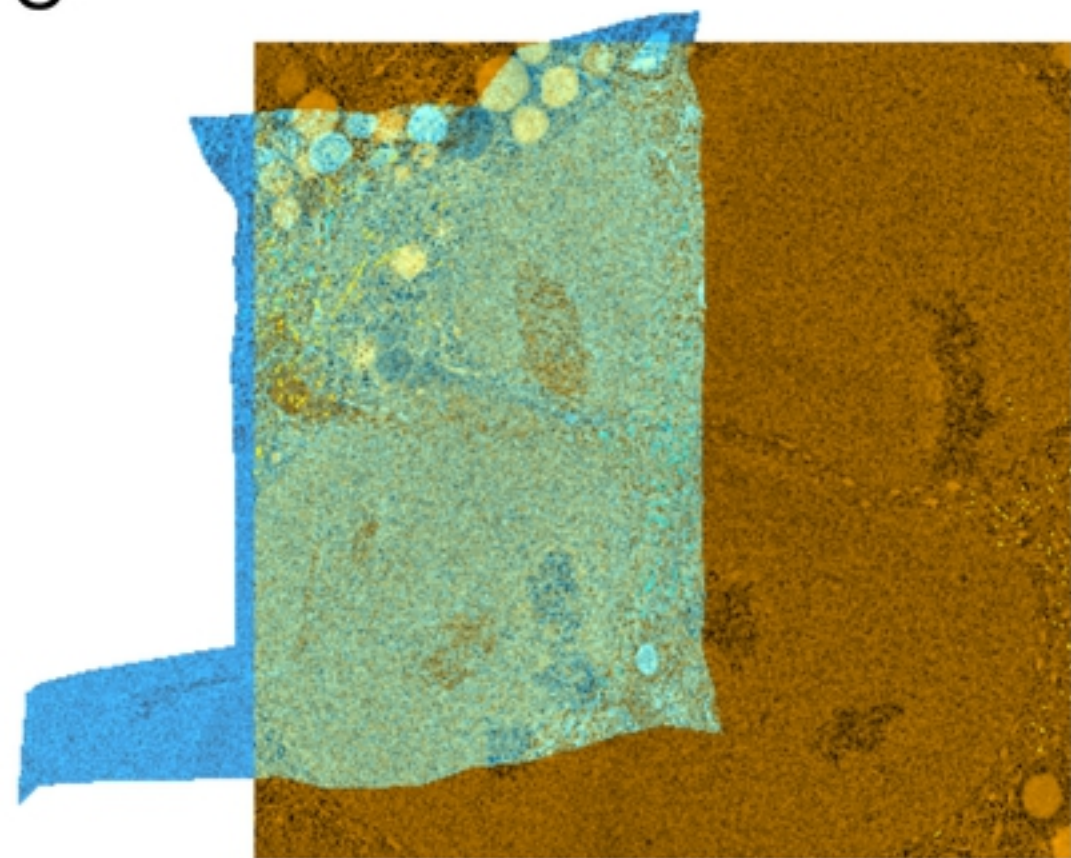

D

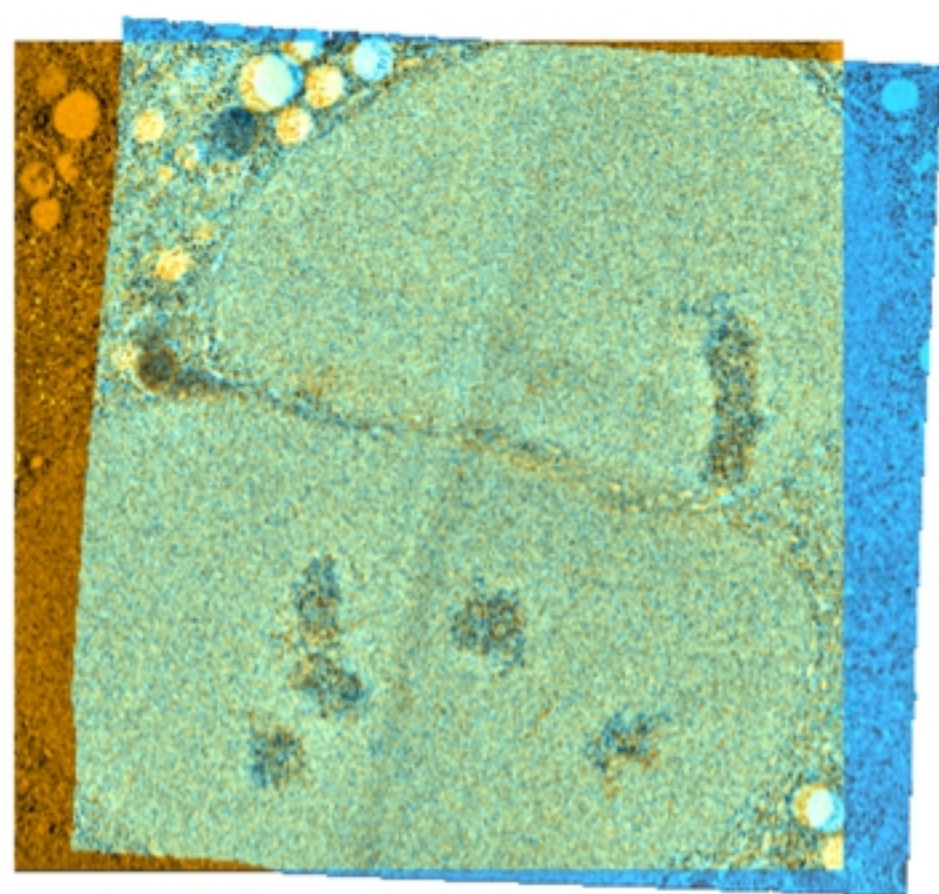

A

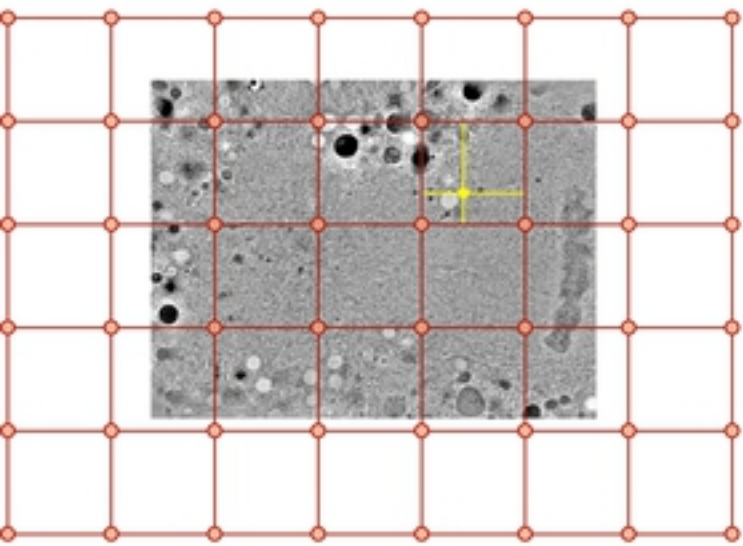

B

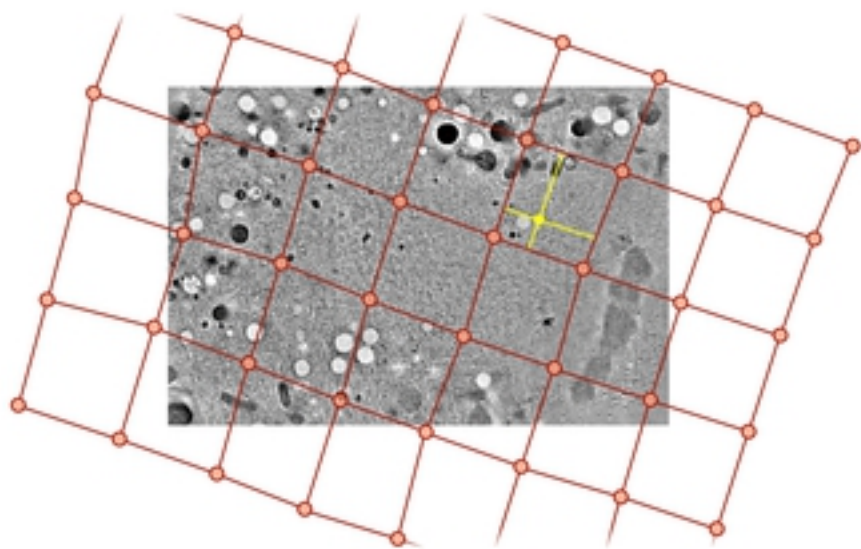

C

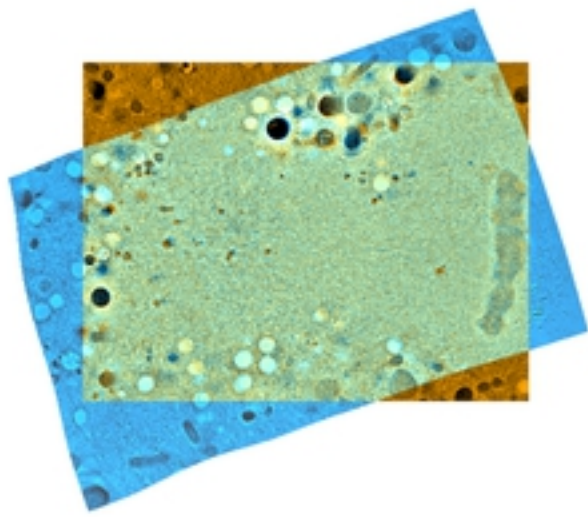

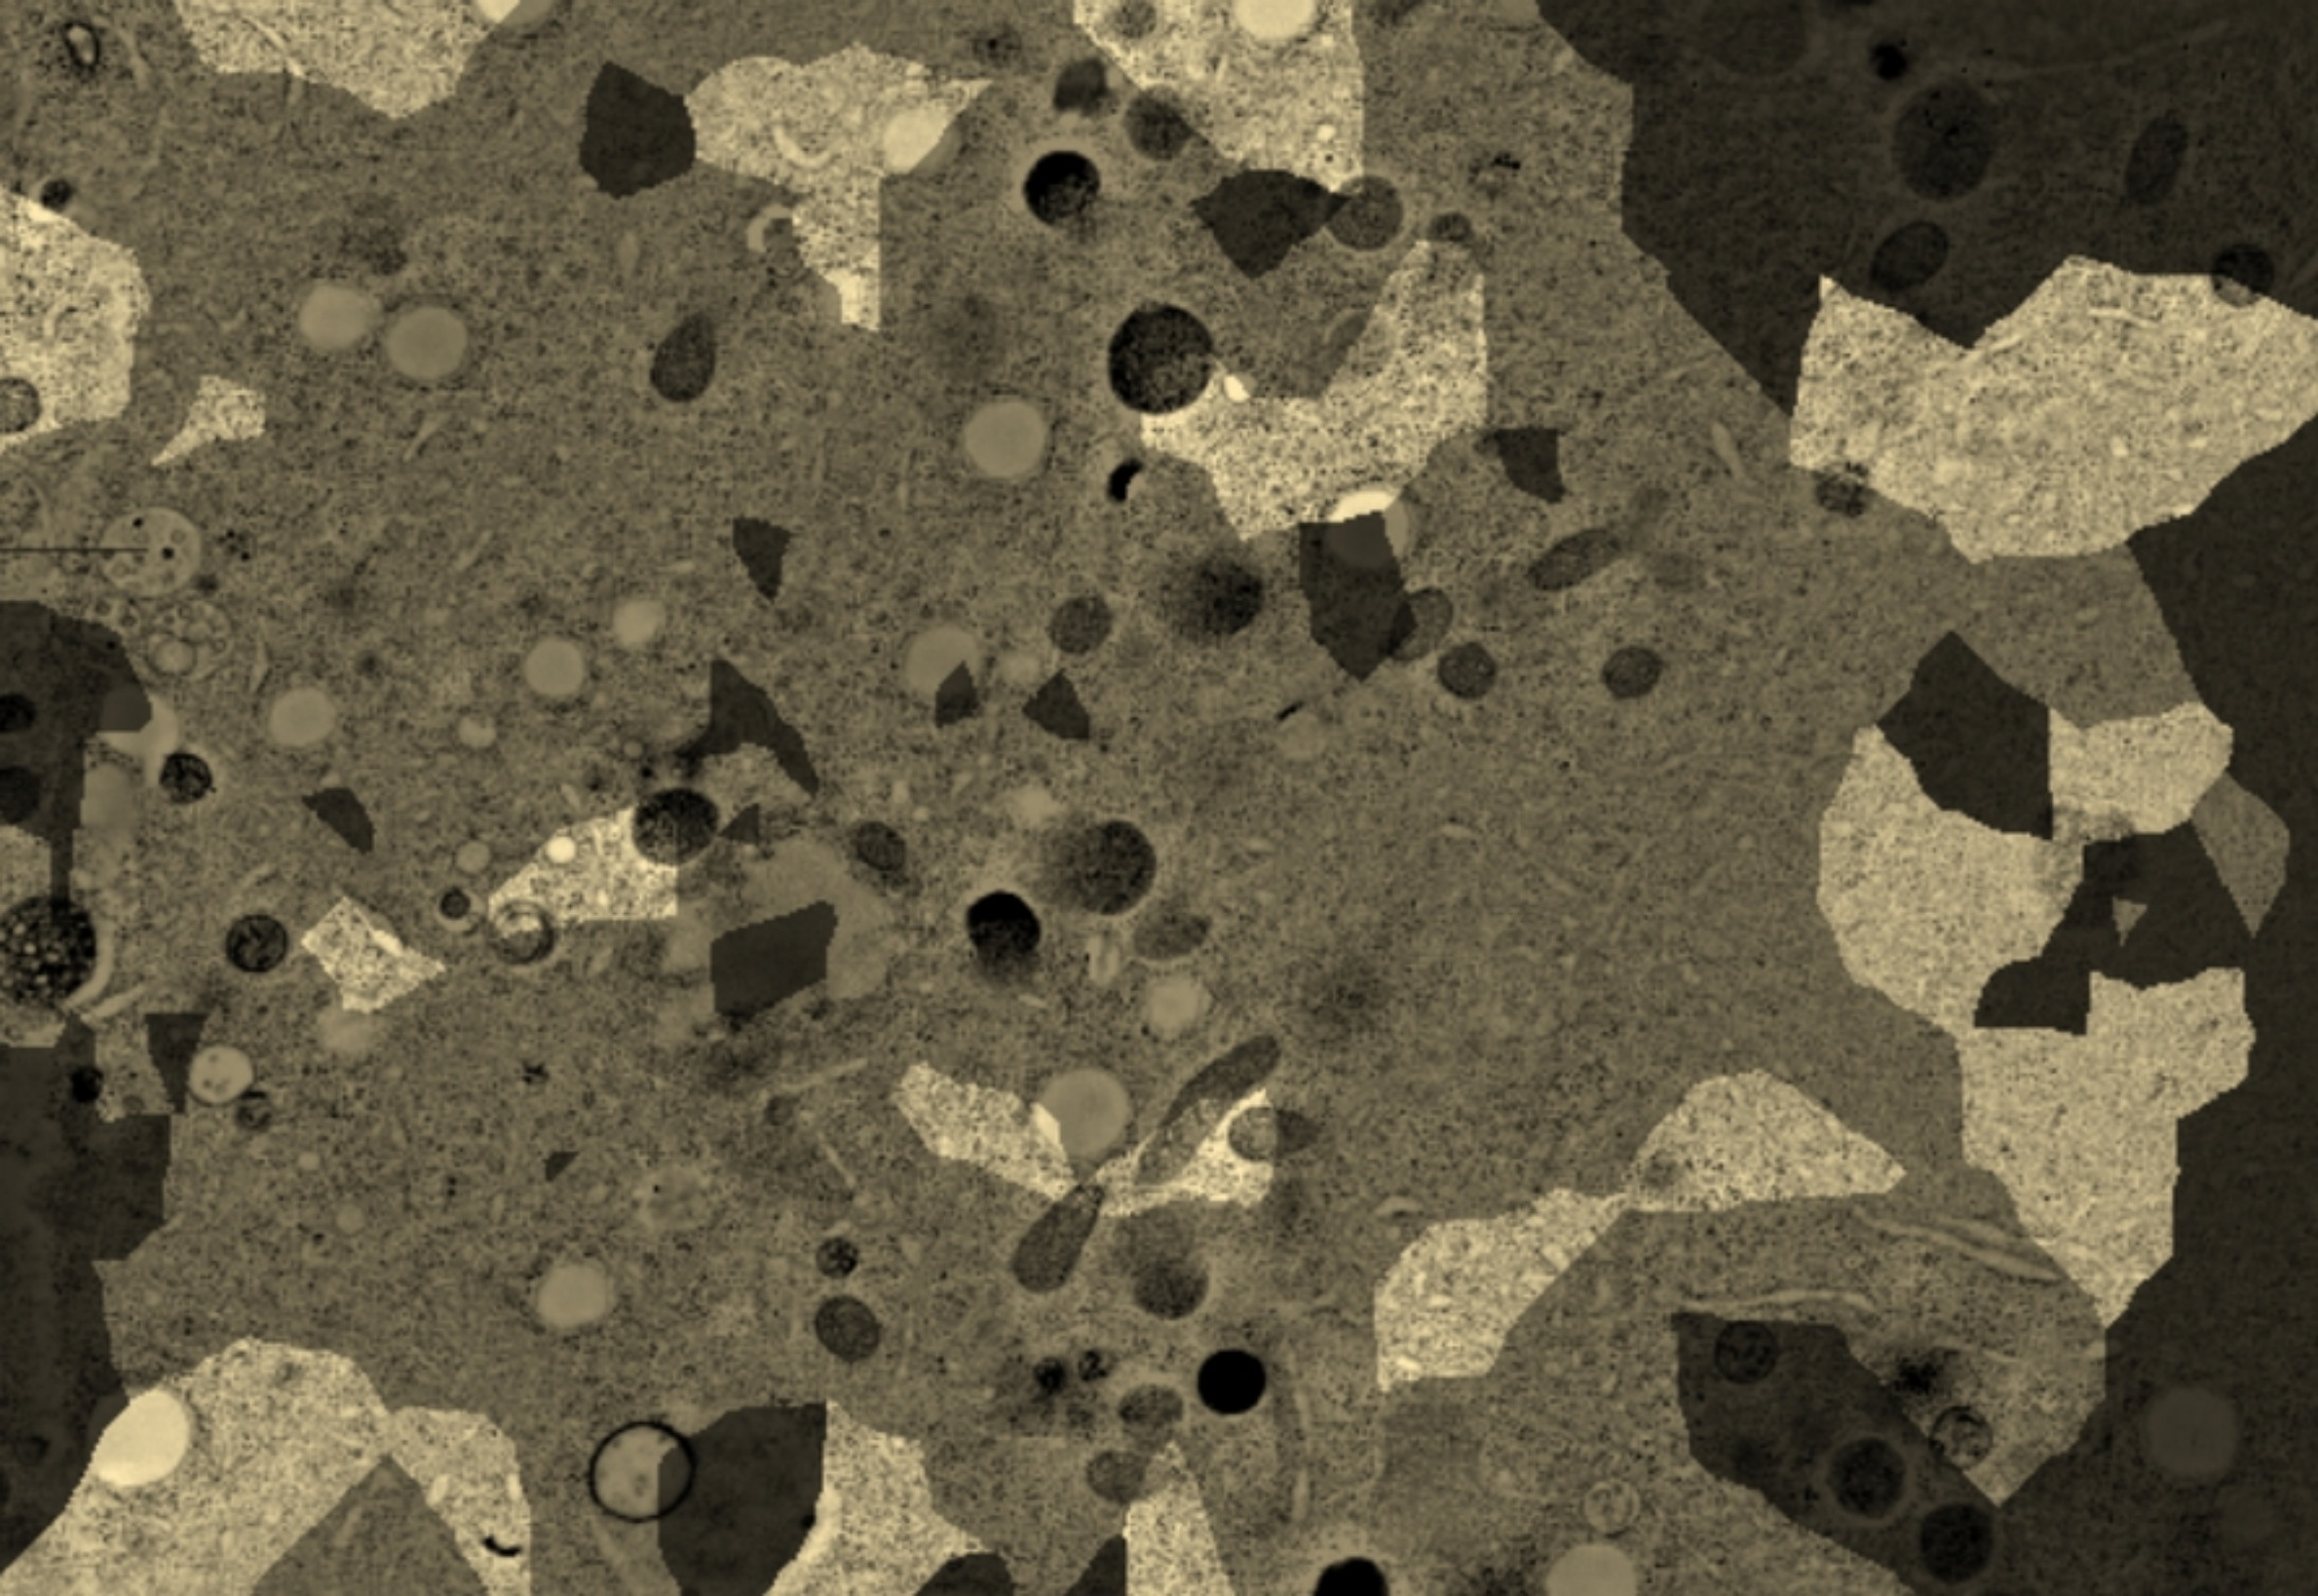

A

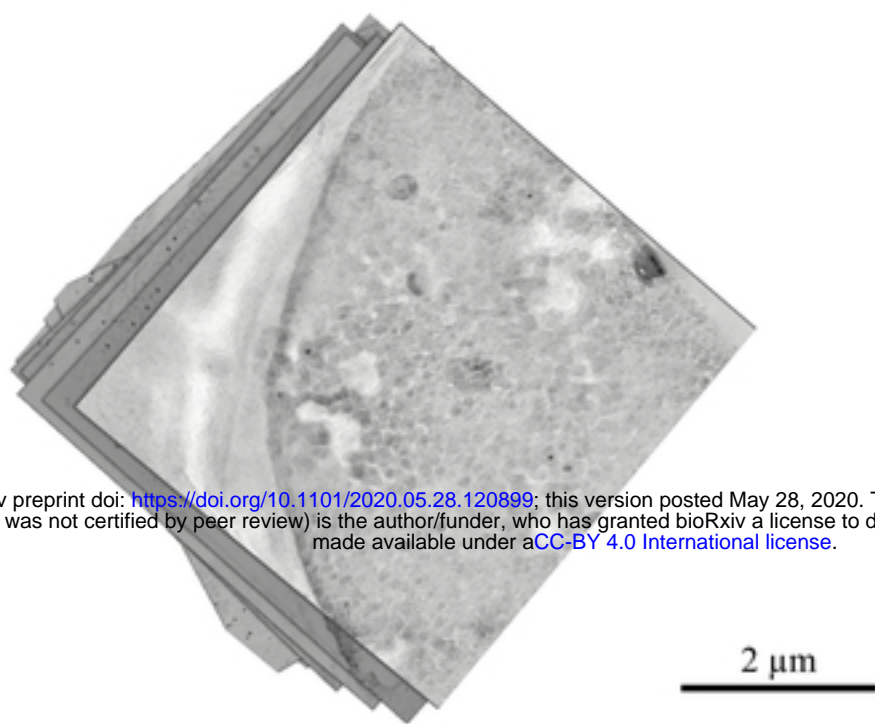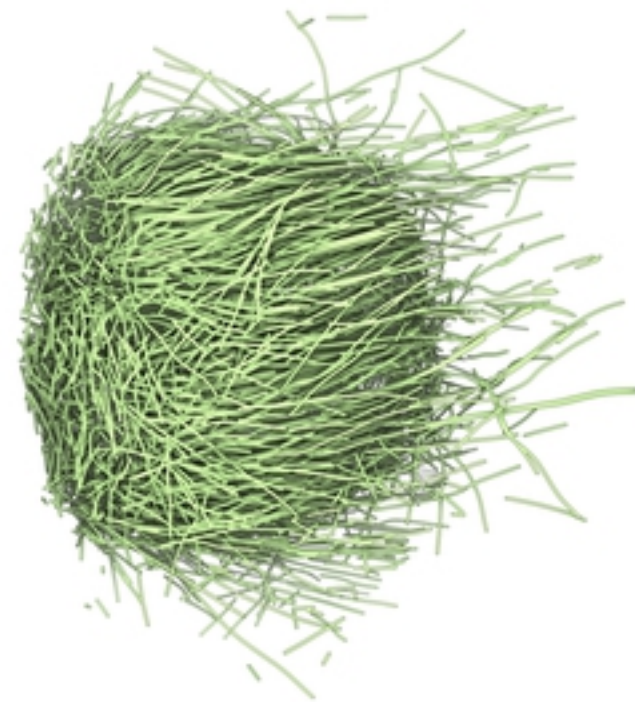

B

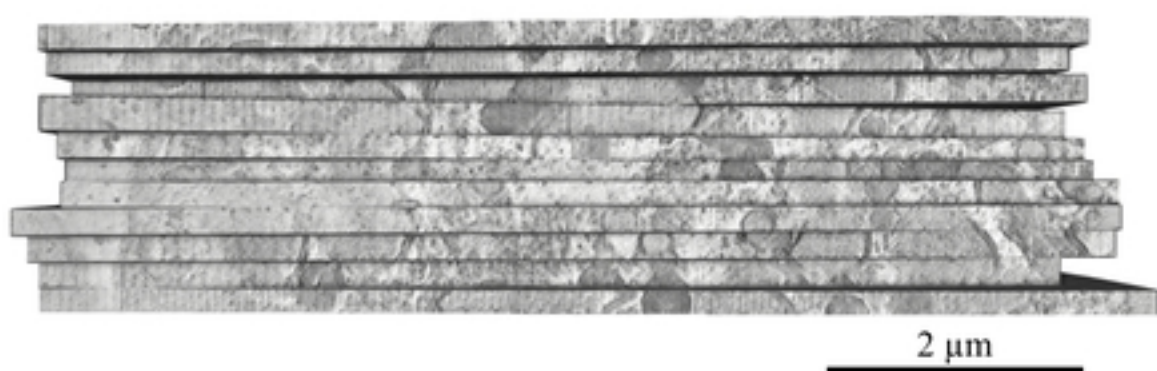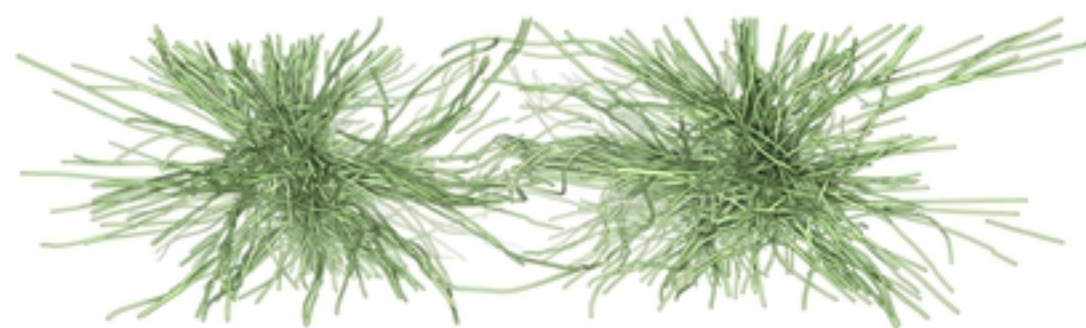

C

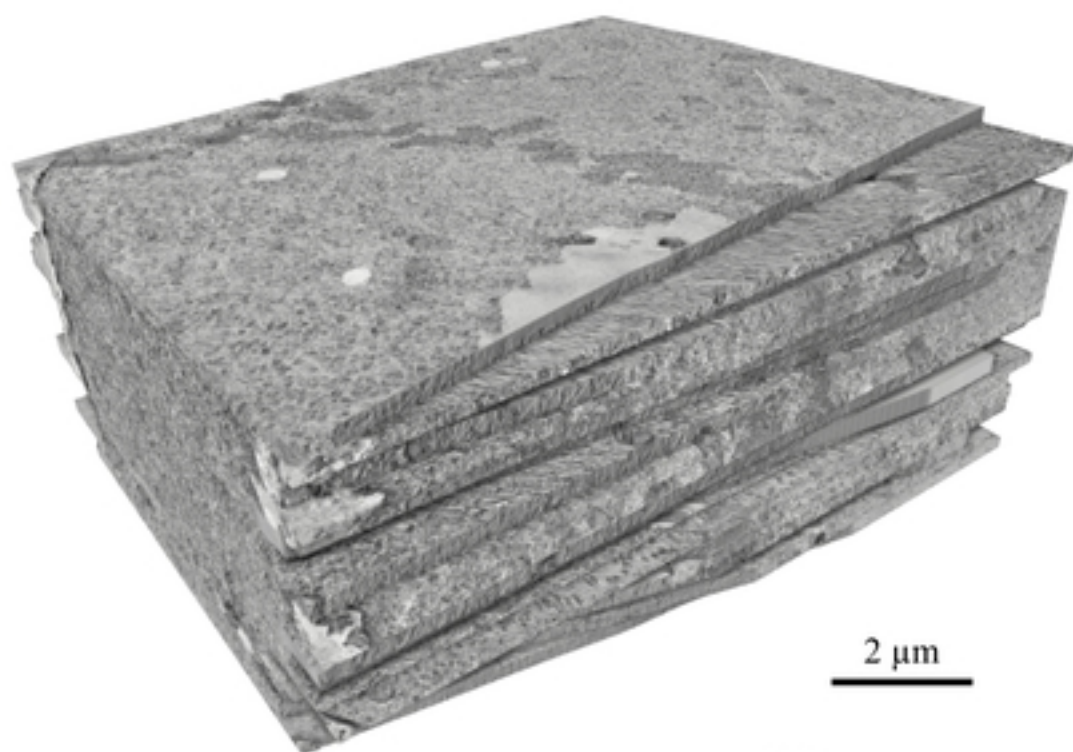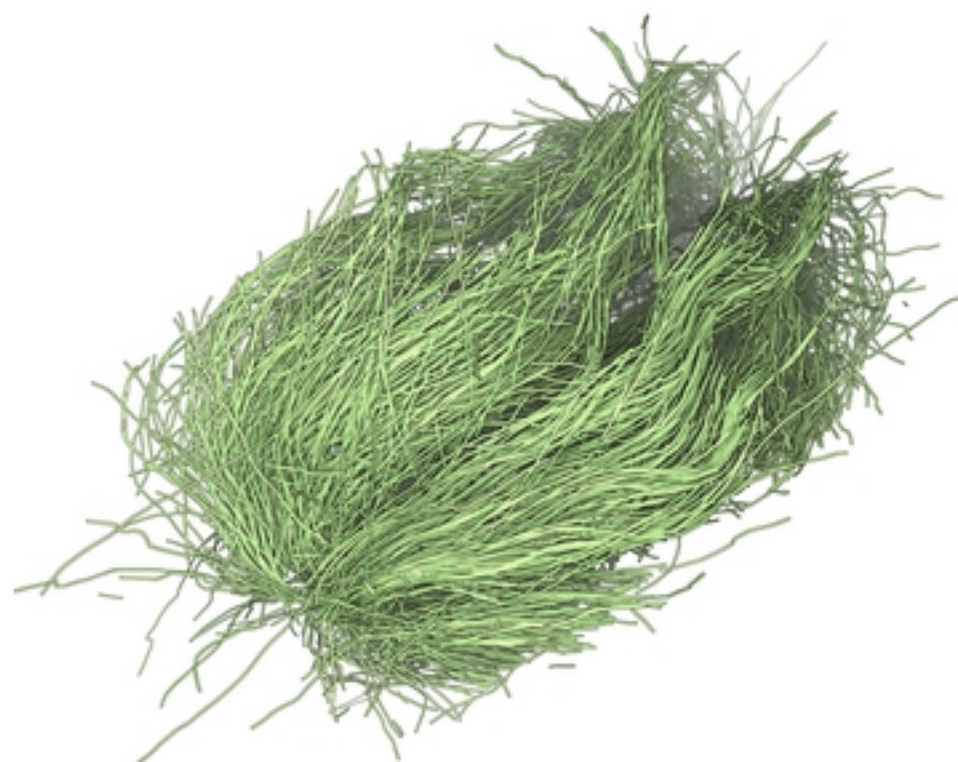

D

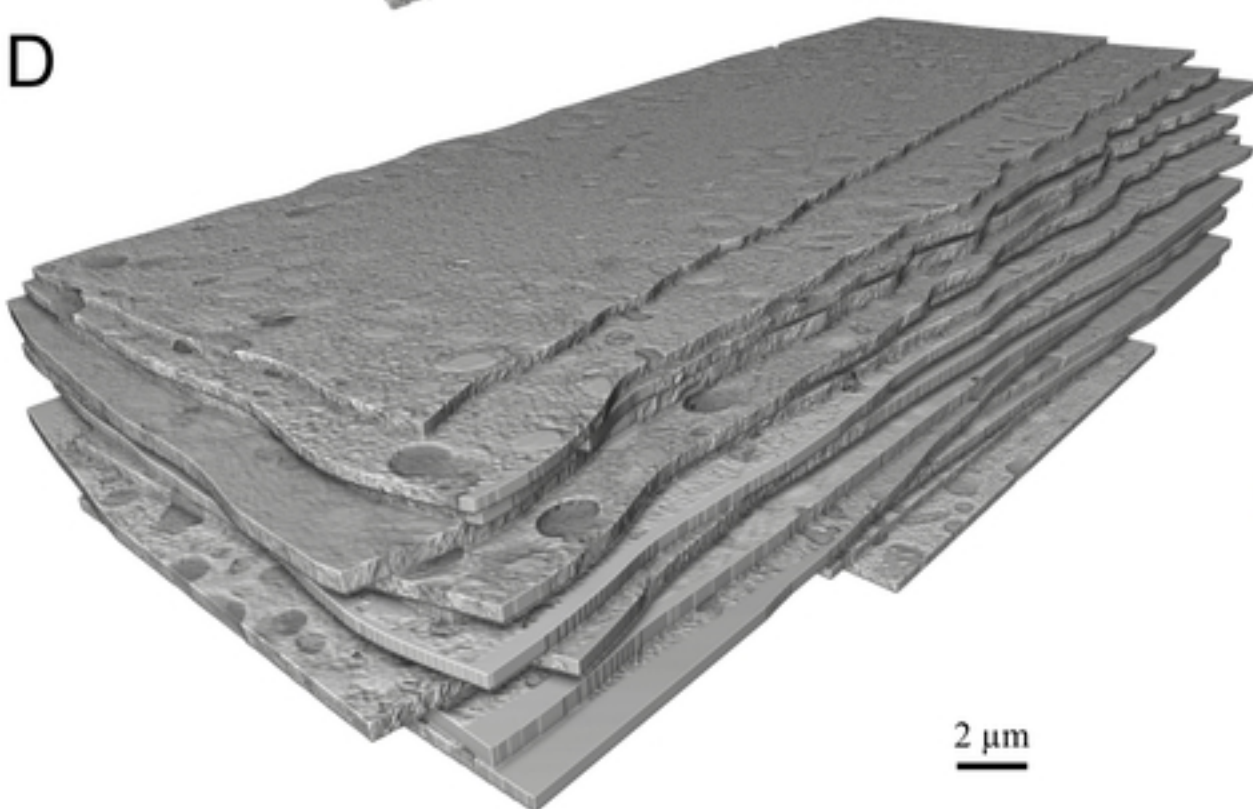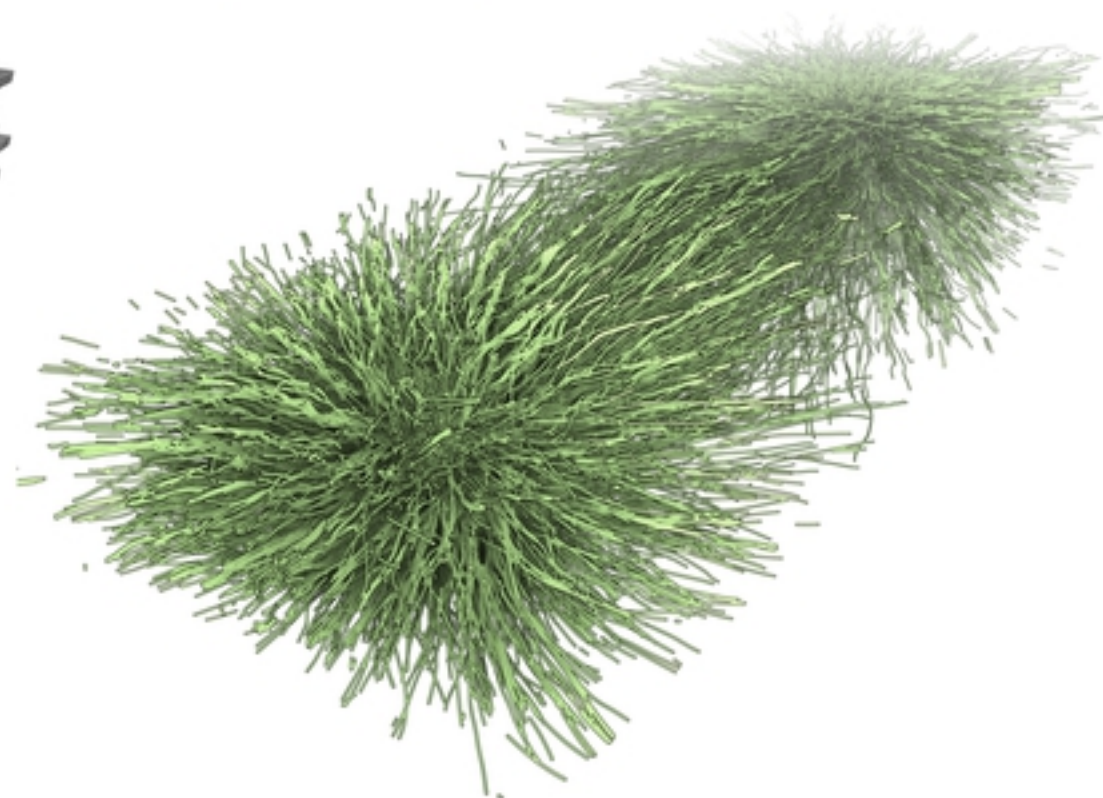

Source: https://www.biorxiv.org/content/10.1101/2020.05.28.120899v1.full.pdf
